# Supplementary material for: Synthesis of 2-hydroxy-3-alkyl-2-phenyl-2,3-dihydroquinazolin-4(1H)-one via molybdenum hexacarbonyl mediated CO gas- and ligand free carbonylative reactions
Source: Royal Society of Chemistry journal article supplement (doi:10.1039/c6ra12510g), 2016-01-01
Supplement: c6ra12510g1.pdf [file c6ra12510g1.pdf]

**Synthesis of 2-hydroxy-3-alkyl-2-phenyl-2, 3-dihydroquinazolin-4(1*H*)-one via molybdenum hexacarbonyl mediated CO gas-and ligand free carbonylative reactions.**

**Subba Rao. Jammula,<sup>a,b</sup> Thalishetti. Krishna,<sup>a</sup> V. Narayana Murthy,<sup>a</sup> Rajesh. Jinkala,<sup>a</sup> Venkateswara Rao. Anna,<sup>b</sup> Akula. Raghunath.<sup>a\*</sup>**

<sup>a</sup>Custom Pharmaceutical Services, Dr. Reddy's Laboratories Limited, Bollaram Road, Miyapur, Hyderabad 500 049, India.

<sup>b</sup> Department of chemistry, Koneru Lakshmaiah University (KLU), Green Fields, Vaddeswaram, Guntur (District), Andhra Pradesh, Pin: 522502, India.

\*E-mail: [raghunadha@drreddys.com](mailto:raghunadha@drreddys.com)

| <b>Supporting Information</b>                                              | <b>P. No</b> |
|----------------------------------------------------------------------------|--------------|
| <b>Section A: General Information .....</b>                                | <b>2</b>     |
| <b>Section B: Experimental Procedure, Table &amp; data.....</b>            | <b>3</b>     |
| <b>Section C: <sup>1</sup>H, <sup>13</sup>C, HRMS and IR spectrum.....</b> | <b>12</b>    |

**General methods:** Unless stated otherwise, reactions were performed under nitrogen atmosphere using oven dried glassware. Reactions were monitored by thin layer chromatography (TLC) on silica gel plates (60 F254), visualizing with ultraviolet light or iodine spray. Flash chromatography was performed on silica gel (100-200 mesh) using distilled hexane, ethyl acetate, dichloromethane.  $^1\text{H}$  NMR and  $^{13}\text{C}$  NMR spectra were determined in  $\text{CDCl}_3$  or  $\text{DMSO}-d_6$  solution by using 400 or 100 MHz spectrometers, respectively. Proton chemical shifts ( $\delta$ ) are relative to tetramethylsilane (TMS,  $\delta = 0.00$ ) as internal standard and expressed in ppm. Spin multiplicities are given as s (singlet), d (doublet), t (triplet) and m (multiplet) as well as b (broad). Coupling constants ( $J$ ) are given in hertz. Melting points were determined using melting point B-540 apparatus and are uncorrected. HRMS was determined using waters LCT premier XETOF ARE-047 apparatus.

**General process for the synthesis of substituted 2-hydroxy-2,3-dihydroquinazolin-4-(1H)-one:**

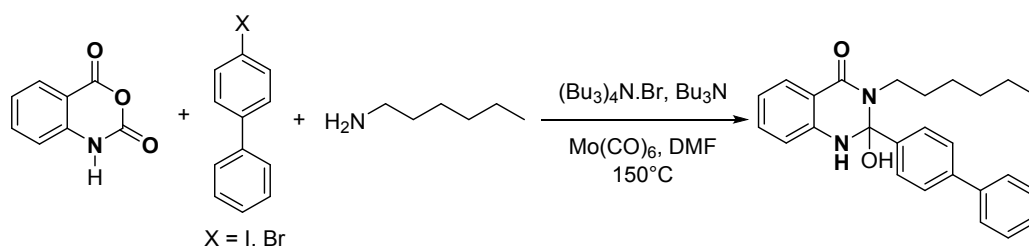

**General procedure:** A mixture of Isatoic anhydride (500 mg, 3.0 mmol), aryl halides (868 mg, 3.0 mmol), amine (344 mg, 3.4 mmol), Mo (CO)<sub>6</sub> (820 mg, 3.0 mmol), Et<sub>4</sub>N.Br (200 mg, 0.6 mmol), and Bu<sub>3</sub>N (689 mg, 3.7 mmol), in DMF (5 mL) was heated to 150°C under argon balloon. Maintained the reaction mass for 15 to 18 hours and check the progress of reaction as indicated by TLC. The reaction mixture was cooled to room temperature and added water (20 mL) and ethyl acetate (20 mL), total reaction mixture was filtered through celite bed and bed washed with Ethyl acetate (3\*20 mL) and both layers were separated and aqueous layer was back extracted with ethyl acetate (20 mL) and then combined organic layers was washed with water (20 mL) and dry over anhydrous Na<sub>2</sub>SO<sub>4</sub> and the total organic layer was concentrated under reduced pressure to afford the crude hydroxy compounds. The above crude was purified by (100-200 mesh silica gel) gravity column purification and product was eluted at 8 to 10 % of EtOAc/Hexanes to give pure hydroxy compounds of 10a to 15o.

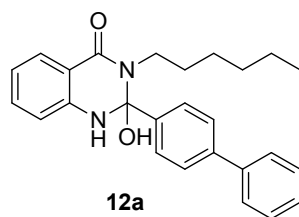

**2-([1, 1'-biphenyl]-4-yl)-3-hexyl-2-hydroxy-2, 3-dihydroquinazolin-4(1H)-one (12a):**

White solid, Yield-72 %, mp: 97-105°C, IR (KBr) = 3325, 2922, 1672, 1548, 1310, 1076, 984, 858, 797, 745, 692, 450 cm<sup>-1</sup>, <sup>1</sup>H NMR (400 MHz, CDCl<sub>3</sub>): δ=12.16 (s, 1H), 8.84 (d, *J* = 8.4 Hz, 1H), 8.12 (d, *J* = 8.4 Hz, 2H), 7.74 (d, *J* = 8.4 Hz, 2H), 7.65 (d, *J* = 7.6 Hz, 2H), 7.55 – 7.26 (m, 5H), 7.13 (t, *J* = 7.6 Hz, 1H). 6.28 (s, br, 1H), 3.50 – 3.43 (m, 2H), 1.68 – 1.56 (m, 2H), 1.40 – 1.25 (m, 6H), 0.91 – 0.89 (m, 3H); <sup>13</sup>C NMR (100 MHz, CDCl<sub>3</sub>): δ =169.2, 144.54, 140.10, 139.83, 133.55, 132.51, 128.91-(2C), 127.97-(2C), 127.92-(2C), 127.42-(2C), 127.23-(2C), 126.4, 122.8, 121.6, 120.8, 40.1, 31.4, 29.4, 26.6, 22.5, 13.9; HRMS: *m/z* calcd for C<sub>26</sub>H<sub>29</sub>N<sub>2</sub>O<sub>2</sub> (M+H) 401.2249, found 401.2241.

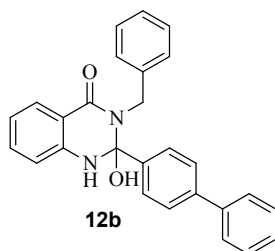

**2-([1, 1'-biphenyl]-4-yl)-3-benzyl-2-hydroxy-2, 3-dihydroquinazolin-4(1H)-one (12b):**

White solid, Yield- 67 %, mp:154-158°C, IR (KBr) = 3325, 2922, 1672, 1548, 1310, 1076, 984, 745, 692, 450 cm<sup>-1</sup>, <sup>1</sup>H NMR (400 MHz, CDCl<sub>3</sub>): δ =12.20 (s, 1H), 8.86 (d, *J* = 8.4 Hz, 1H), 8.13 (d, *J* = 8.4 Hz, 2H), 7.75 (d, *J* = 8.0 Hz, 2H), 7.56 -7.32 (m, 12H), 7.12 (t, *J* = 7.6 Hz, 1H), 6.56 (s, 1H), 4.68 (d, *J* = 5.6 Hz, 2H), <sup>13</sup>C NMR (100 MHz, CDCl<sub>3</sub>): δ = 167.0, 144.3, 139.9, 138.1, 132.9, 132.8, 128.8, 128.7, 128.6, 127.97-(2C), 127.93-(2C), 127.90-(2C), 127.83, 127.81, 127.77, 127.60, 127.48, 127.40, 127.21, 127.17, 126.5, 122.8, 121.6, 44.0; HRMS: *m/z* calcd for C<sub>27</sub>H<sub>23</sub>N<sub>2</sub>O<sub>2</sub> (M+H) 406.1760, found 406.1757.

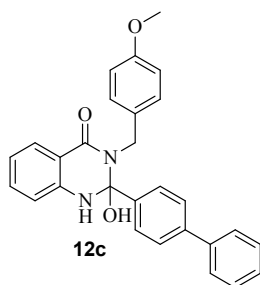

**2-((1, 1'-biphenyl)-4-yl)-2-hydroxy-3-(4-methoxybenzyl)-2, 3-dihydroquinazolin-4(1H)-one (12c):** Brown solid, Yield-58 %, mp : 168-172°C, IR (KBr) = 3328, 2926, 1638, 1512, 1428, 1249, 1027, 809, 746, 580, 520  $\text{cm}^{-1}$ ,  $^1\text{H}$  NMR (400 MHz,  $\text{CDCl}_3$ ):  $\delta$ = 12.22 (s, 1H), 8.86 (d,  $J$ = 8.4 Hz, 1H), 8.14 (d,  $J$ = 8.4 Hz, 1H), 7.86 (d,  $J$ = 8.4 Hz, 2H), 7.75 (d,  $J$ = 8.4 Hz, 1H), 7.66 (d,  $J$ = 6.4 Hz, 2H), 7.56-7.49 (m, 5H), 7.44-7.38 (m, 1H), 7.38-7.26 (m, 2H), 6.91-6.85 (m, 2H), 6.36 (s, 1H), 4.61 (d,  $J$ = 4.8 Hz, 2H), 3.80 (s, 3H),  $^{13}\text{C}$  NMR (100 MHz,  $\text{CDCl}_3$ ):  $\delta$  = 169.00, 166.30, 159.10, 144.27, 140.05, 133.51, 133.05, 132.76, 130.25, 129.27, 129.24, 128.88, 128.87, 127.95, 127.92, 127.45, 127.39, 127.20, 127.17, 127.14, 126.56, 122.78, 121.57, 120.26, 114.24, 114.14, 55.28, 43.6; HRMS:  $m/z$  calcd for  $\text{C}_{28}\text{H}_{25}\text{N}_2\text{O}_3$  (M+H) 437.1865, found 437.1865.

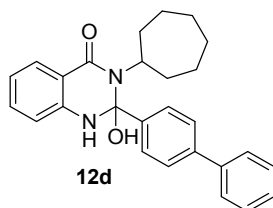

**2-((1, 1'-biphenyl)-4-yl)-3-cycloheptyl-2-hydroxy-2, 3-dihydroquinazolin-4(1H)-one (12d):** White solid, Yield- 70 %, mp: 139-142°C, IR (KBr) = 3337, 2923, 1628, 1512, 1446, 1278, 1006, 901, 743, 662, 546  $\text{cm}^{-1}$ ,  $^1\text{H}$  NMR (400 MHz,  $\text{CDCl}_3$ ):  $\delta$ = 12.09 (s, 1H), 8.82 (d,  $J$ = 8.4 Hz, 1H), 8.12 (d,  $J$ = 8.4 Hz, 2H), 7.74 (d,  $J$ = 8.4 Hz, 2H), 7.59-7.41 (m, 7H), 7.10 (t,  $J$ = 7.2 Hz, 1H), 6.23 (s, br, 1H), 4.19-4.17 (m, 1H), 2.08-2.02 (m, 2H), 1.67-1.56 (m, 10H);  $^{13}\text{C}$  NMR (100 MHz,  $\text{CDCl}_3$ ):  $\delta$  = 168.02, 144.44, 143.97, 140.04, 140.01, 139.81, 133.70, 132.43, 128.86-(2C), 128.85-(2C), 127.92-(2C), 127.89-(2C), 127.30-(2C), 127.12, 50.95, 50.88, 35.16, 35.00, 27.99, 27.96, 24.11, 24.00; HRMS:  $m/z$  calcd for  $\text{C}_{27}\text{H}_{29}\text{N}_2\text{O}_2$  (M+H) 413.2229, found 413.2228.

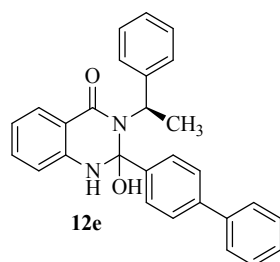

**2-((1, 1'-biphenyl)-4-yl)-2-hydroxy-3-(R)-1-phenylethyl)-2, 3-dihydroquinazolin-4 (1H)-one, (12e):** Colorless solid, Yield-62 %, mp = 205-211°C, IR (KBr) = 3334, 2969, 1670, 1591, 1259, 1160, 883, 753, 558 cm<sup>-1</sup>; <sup>1</sup>H NMR (400 MHz, CDCl<sub>3</sub>): δ= 12.10 (s, 1H), 8.84 (d, *J*= 8.4 Hz, 1H), 8.09 (d, *J*= 8.0 Hz, 2H), 7.73 (d, *J*= 8.4 Hz, 2H), 7.65 (d, *J*= 7.2 Hz, 2H), 7.56-7.48 (m, 4H), 7.46-7.38 (m, 5H), 7.36-7.30 (m, 1H), 7.13 (t, *J*= 7.6 Hz, 1H), 6.48 (d, *J*= 7.2 Hz, 1H), 5.37-5.30 (m, 1H), 1.65 (d, *J*= 6.8 Hz, 3H); <sup>13</sup>C NMR (100 MHz, CDCl<sub>3</sub>): δ= 166.24, 144.31, 143.11, 140.01, 133.22, 128.89-(2C), 128.76-(2C), 127.97-(3C), 127.48-(3C), 127.43-(3C), 127.22-(3C), 127.19-(3C), 126.26-(2H), 49.24, 21.72, HRMS: *m/z* calcd for C<sub>28</sub>H<sub>25</sub>N<sub>2</sub>O<sub>2</sub> (M+H) 421.1898 found 421.1896.

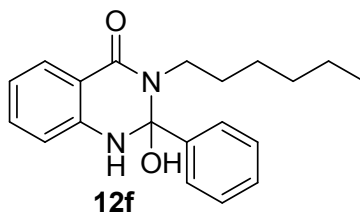

**3-hexyl-2-hydroxy-2-phenyl-2, 3-dihydroquinazolin-4 (1H)-one (12f):** Syrupy liquid, Yield- 68 %, IR (KBr) = 3345, 2928, 1642, 1525, 1449, 1302, 1159, 1029, 758, 26 cm<sup>-1</sup>, <sup>1</sup>H NMR (400 MHz, CDCl<sub>3</sub>): δ= 12.09 (s, 1H), 8.82 (d, *J*= 8.4 Hz, 1H), 8.05 (d, *J*= 7.6 Hz, 2H), 7.54-7.42 (m, 5H), 7.13 (t, *J*= 7.6 Hz, 1H), 6.2 (s, 1H), 3.48-3.43 (m, 2H), 1.66-1.59 (m, 2H), 1.40-1.31 (m, 6H), 0.93-0.89 (m, 3H), <sup>13</sup>CNMR (100 MHz, CDCl<sub>3</sub>): δ = 169.18, 139.77, 134.82, 132.48, 131.77, 131.27, 128.73, 128.52, 127.37, 126.78, 126.45, 122.80, 121.60, 120.86, 40.11, 31.44, 29.40, 26.64, 22.53, 13.97, HRMS: *m/z* calcd for C<sub>20</sub>H<sub>25</sub>N<sub>2</sub>O<sub>2</sub> (M+H) 325.1916, found 325.1911.

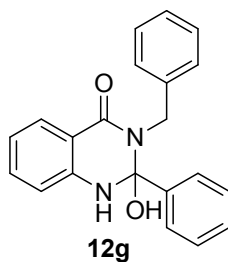

**3-benzyl-2-hydroxy-2-phenyl-2, 3-dihydroquinazolin-4 (1H)-one: (12g):** Syrupy liquid, Yield- 68 %, IR (KBr) = 3294, 2925, 1680, 1525, 1157, 1044, 796, 755, 580 cm<sup>-1</sup>, <sup>1</sup>H NMR

(400 MHz, CDCl<sub>3</sub>):  $\delta$ = 12.10 (s, 1H), 8.83 (d,  $J$ = 8.4 Hz, 1H), 8.05 (d,  $J$ = 6.8 Hz, 2H), 7.57-7.50 (m, 5H), 7.39-7.31 (m, 5H), 7.10 (t,  $J$ = 7.6Hz, 1H), 6.60 (s, br, 1H), 4.66 (d,  $J$ = 5.6 Hz, 2H), <sup>13</sup>C NMR (100 MHz, CDCl<sub>3</sub>):  $\delta$  = 169.06, 139.88, 137.43, 134.73, 132.75, 131.82, 131.53, 128.85, 128.74, 128.65, 128.56, 127.82, 127.78, 127.71, 127.59, 127.35, 126.90, 126.58, 122.82, 121.56, 44.02, HRMS:  $m/z$  calcd for C<sub>21</sub>H<sub>19</sub>N<sub>2</sub>O<sub>2</sub> (M+H) 331.1447 found 331.1440.

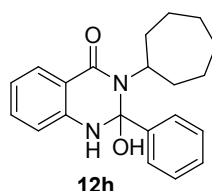

**3-cycloheptyl-2-hydroxy-2-phenyl-2,3-dihydroquinazolin-4(1H)-one (12h):** Brown solid, Yield-65 %, mp: 89-94°C, IR (KBr) = 3327, 2856, 1630, 1491, 1073, 887, 752, 671 cm<sup>-1</sup>, <sup>1</sup>H NMR (400 MHz, CDCl<sub>3</sub>):  $\delta$ = 12.10 (s, 1H), 8.80 (d,  $J$ = 8.0 Hz, 1H), 8.05 (d,  $J$ = 7.2 Hz, 2H), 7.46-7.40 (m, 5H), 7.12 (t,  $J$ = 7.6 Hz, 1H), 6.20 (s, 1H), 4.16 (s, 1H), 2.04-2.03 (m, 2H), 1.66-1.54 (m, 10H); <sup>13</sup>C NMR (100 MHz, CDCl<sub>3</sub>):  $\delta$  = 168.50, 132.52, 131.76, 131.20, 128.75, 128.50-(2C), 127.41-(2C), 126.78-(2C), 126.33, 122.79, 50.93, 50.86, 35.20, 35.08, 28.05, 28.01, 24.15, 24.04, HRMS:  $m/z$  calcd for C<sub>21</sub>H<sub>25</sub>N<sub>2</sub>O<sub>2</sub> (M+H) 337.1916 found 337.1890.

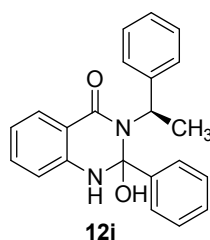

**2-hydroxy-2-phenyl-3-((R)-1-phenylethyl)-2,3-dihydroquinazolin-4(1H)-one (12i):** White solid, Yield-60 %, mp: 101-106°C, IR (KBr) = 3305, 2927, 1634, 1446, 1209, 1028, 928, 754, 700, 551 cm<sup>-1</sup>, <sup>1</sup>H NMR (400 MHz, CDCl<sub>3</sub>):  $\delta$ = 12.04 (s, 1H), 8.81 (d,  $J$ = 8.8 Hz, 1H), 8.01 (d,  $J$ = 7.6 Hz, 1H), 7.78 (d,  $J$ = 7.6 Hz, 2H), 7.54-7.47 (m, 2H), 7.43-7.36 (m, 6H), 7.31-7.25 (m, 2H), 6.34 (s, br, 1H), 5.37-5.30 (m, 1H), 1.61 (d,  $J$ = 6.4 Hz, 3H); <sup>13</sup>C NMR (100 MHz, CDCl<sub>3</sub>):  $\delta$  = 166.53, 143.09, 134.59, 132.75, 131.76, 131.44, 128.85, 128.74-(2C), 128.54-(2C), 127.66, 127.46, 127.40, 126.88, 126.43, 126.23, 126.16, 122.80, 121.67, 49.20, 21.69, HRMS:  $m/z$  calcd for C<sub>22</sub>H<sub>21</sub>N<sub>2</sub>O<sub>2</sub> (M+H) 345.1503 found 345.1595.

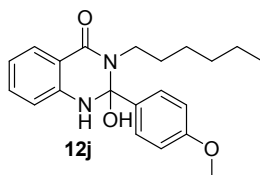

**3-hexyl-2-hydroxy-2-(4-methoxyphenyl)-2, 3- dihydroquinazolin-4 (1H)-one, (12j);** Brown solid, Yield-48 %, mp:68-72°C, IR (KBr) = 3337, 2923, 1682, 1512, 1446, 1278, 1006, 901, 662, 546  $\text{cm}^{-1}$ ,  $^1\text{H}$  NMR (400 MHz,  $\text{CDCl}_3$ ):  $\delta$  = 12.10 (s, 1H), 8.79 (d,  $J$ = 8.4 Hz, 1H), 8.01 (d,  $J$ = 8.4 Hz, 2H), 7.52-7.47 (m, 2H), 7.05-6.91 (m, 2H), 6.69-6.63 (m, s, 1H), 6.32 (s, 1H), 3.87 (s, 3H), 3.48-3.40 (m, 2H), 1.66-1.56 (m, 2H), 1.41-1.27 (m, 6H), 0.91-0.88 (m, 3H),  $^{13}\text{C}$  NMR (100 MHz,  $\text{CDCl}_3$ ):  $\delta$ = 169.18, 165.59, 139.77, 134.82, 132.48, 131.77, 131.27, 128.73, 127.37, 126.8, 126.45, 122.80, 121.60, 120.86, 55.42, 40.11, 31.44, 29.40, 26.64, 22.53, 13.97; HRMS:  $m/z$  calcd for  $\text{C}_{21}\text{H}_{27}\text{N}_2\text{O}_3$  (M+H) 355.2022 found 355.2007.

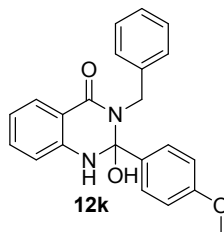

**3-benzyl-2-hydroxy-2-(4-methoxyphenyl)-2, 3-dihydroquinazolin-4- (1H)-one, (12k):** White solid, Yield-48 %, mp: 115-119°C, IR (KBr) =3327, 2856, 1630, 1556, 1073, 887, 752, 671, 585  $\text{cm}^{-1}$ ,  $^1\text{H}$  NMR (400 MHz,  $\text{CDCl}_3$ ):  $\delta$ = 12.04 (s, 1H), 8.81 (d,  $J$ = 8.4 Hz, 1H), 8.03 (d,  $J$ = 8.8 Hz, 2H), 7.56-7.49 (m, 3H), 7.39-7.29 (m, 5H), 7.01 (d,  $J$ = 8.4 Hz, 2H), 6.32 (s, 1H), 4.61 (d,  $J$ = 5.2 Hz, 2H), 3.87 (s, 3H),  $^{13}\text{C}$  NMR (100 MHz,  $\text{CDCl}_3$ ):  $\delta$ = 169.14, 162.51, 140.30, 137.45, 135.03, 132.86, 132.40, 129.32, 128.77, 128.42, 127.85, 127.79, 127.55, 127.05, 126.42, 122.57, 121.61, 120.10, 117.35, 116.59, 55.42, 44.11; HRMS:  $m/z$  calcd for  $\text{C}_{22}\text{H}_{21}\text{N}_2\text{O}_2$  (M+H) 361.1552 found 361.1537.

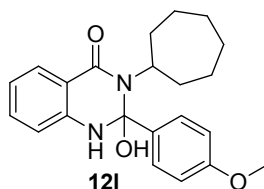

**3-cycloheptyl-2-hydroxy-2-(4-methoxyphenyl)-2, 3-dihydroquinazolin-4(1H)-one, (12l):** Syrupy liquid, Yield-52 %, IR (KBr) = 3314, 2856, 1678, 1591, 1412, 1173, 1022, 834, 755, 666, 573, 528  $\text{cm}^{-1}$ ,  $^1\text{H}$  NMR (400 MHz,  $\text{CDCl}_3$ ):  $\delta$  = 11.99 (s, 1H), 8.78 (d,  $J$ = 8.4 Hz, 1H), 8.02 (d,  $J$ = 8.8 Hz, 2H), 7.54-7.45 (m, 2H), 7.10 (t,  $J$ = 8.0 Hz, 1H), 7.01 (d,  $J$ = 8.8 Hz, 2H),



6.18 (s, br, 1H), 4.17-4.15 (m, 1H), 3.87 (s, 3H), 2.07-2.01 (m, 2H), 1.68-1.53 (m, 10 H), <sup>13</sup>C NMR (100 MHz, CDCl<sub>3</sub>): δ= 168.07, 162.42, 140.00, 132.45, 129.28-(2C), 127.15-(2C), 126.36, 122.52-(2C), 121.52, 120.90, 113.92, 55.41, 50.90, 35.03-(2C), 27.98-(2C), 23.99-(2C), HRMS: m/z calcd for C<sub>22</sub>H<sub>27</sub>N<sub>2</sub>O<sub>3</sub> (M+H) 367.2022 found 367.2030.

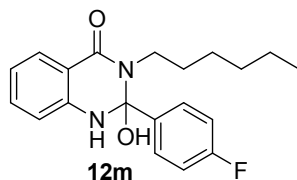

**2-(4-fluorophenyl)-3-hexyl-2-hydroxy-2,3-dihydroquinazolin-4(1H)-one, (12m):** White solid, Yield-26 %, mp:170-176°C, IR (KBr) = 3327, 2856, 1681, 1525, 1491, 1073, 887, 671, 585, 527 cm<sup>-1</sup>, <sup>1</sup>H NMR (400 MHz, CDCl<sub>3</sub>): δ = 12.10 (s, 1H), 8.82 (d, J= 8.8 Hz, 1H), 8.07-8.06 (m, 2H), 7.55-7.49 (m, 2H), 7.20-7.08 (m, 3H), 6.21 (s, br, 1H), 3.49-3.42 (m, 2H), 1.67-1.63 (m, 2H), 1.41-1.33 (m, 6H), 0.91-0.88 (m, 3H), <sup>13</sup>C NMR (100 MHz, CDCl<sub>3</sub>): δ= 169.7, 165.8 (C-F), 129.83, 129.75 (2C), 126.33, 122.90 (2C), 121.55 (2C), 115.88 (2C), 115.66 (2C), 40.12, 31.42, 29.38, 26.63, 22.53, 13.99, HRMS: m/z calcd for C<sub>20</sub>H<sub>24</sub>FN<sub>2</sub>O<sub>2</sub> (M+H) 343.1803 found 343.1822.

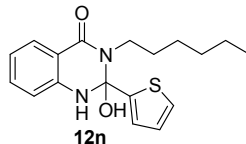

**3-hexyl-2-hydroxy-2-(thiophen-2-yl)-2,3-dihydroquinazolin-4(1H)-one, (12n):** Syrupy liquid, Yield-80 %, IR (KBr) = 3334, 2868, 1670, 1591, 1259, 1160, 883, 753, 558 cm<sup>-1</sup>; <sup>1</sup>H NMR (400MHz, CDCl<sub>3</sub>): δ= 12.16 (s, 1H), 8.73 (d, J= 8.4 Hz, 1H), 7.77 (d, J= 3.2 Hz, 1H), 7.54-7.47 (m, 3H), 7.14-7.07 (m, 2H), 6.28 (s, br, 1H), 3.49-3.41 (m, 2H), 1.70-1.60 (m, 2H), 1.42-1.32 (m, 6H), 0.94-0.86 (m, 3H); <sup>13</sup>C NMR (100 MHz, CDCl<sub>3</sub>): δ= 169.14, 160.32, 139.73, 132.63 (2C), 130.97, 128.53, 127.91, 126.38, 122.72, 121.37, 120.23, 40.13, 31.45, 29.39, 26.65, 22.53, 13.98; HRMS: m/z calcd for C<sub>18</sub>H<sub>23</sub>SN<sub>2</sub>O<sub>2</sub> (M+H) 331.1469 found 331.1480.

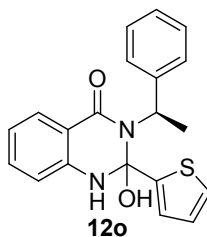

**2-hydroxy-3-((R)-1-Phenylethyl)-2-(thiophen-2-yl)-2, 3-dihydroquinazolin-4 (1H)-one, (18):** Brown solid, Yield-77 %, mp: 143-149°C, IR (KBr) = 3334, 2969, 1626, 1591, 1259, 1160, 1090, 883, 753  $\text{cm}^{-1}$ ,  $^1\text{H}$  NMR (400 MHz,  $\text{CDCl}_3$ ):  $\delta$ = 12.1 (s, 1H), 8.72 (d,  $J$ = 8.0 Hz, 1H), 7.73 (d,  $J$ =4 Hz, 1H), 7.41-7.25 (m, 8H), 7.13-7.05 (m, 2H), 6.52 (s, br, 1H), 5.38-5.29 (m, 1H), 1.68-1.64 (d,  $J$ = 16.8 Hz, 3H),  $^{13}\text{C}$  NMR (100 MHz,  $\text{CDCl}_3$ ):  $\delta$ = 168.32, 142.47, 140.43, 139.91, 132.86, 131.01, 129.88, 128.88, 128.75, 128.55, 128.00, 127.90, 127.71, 127.55, 126.42, 126.19, 122.71, 121.42, 49.33, 21.60, HRMS:  $m/z$  calcd for  $\text{C}_{20}\text{H}_{19}\text{SN}_2\text{O}_2$  (M+H) 351.1167 found 351.1176.

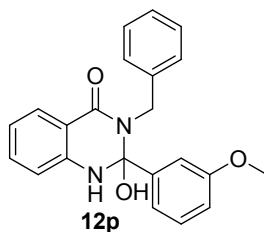

**3-Benzyl-2-hydroxy-2-(3-methoxy phenyl)-2, 3-dihydro quinazolin-4(1H) one (12p):** White solid, Yield-49 %,  $^1\text{H}$  NMR (400 MHz,  $\text{CDCl}_3$ ):  $\delta$  = 12.13 (s, 1H), 8.78 (d,  $J$ = 8.4 Hz, 1H), 7.59-7.58 (m, 2H), 7.50-7.49 (m, 2H), 7.41-7.25 (m, 6H), 7.07-7.05 (m, 2H), 6.75 (s, br, 1H), 4.65-4.62 (m, 2H), 3.87 (s, 3H);  $^{13}\text{C}$  NMR (100 MHz,  $\text{CDCl}_3$ ):  $\delta$ = 169.2, 167.3, 165.4, 159.9, 159.7, 139.7, 136.3, 132.4, 129.7, 129.4, 126.4, 122.8, 121.5, 120.8, 119.1, 118.5, 118.3, 117.4, 112.4, 112.2, 53.4, 41.1; HRMS:  $m/z$  calcd for  $\text{C}_{22}\text{H}_{21}\text{N}_2\text{O}_3$  (M+H) 361.1552 found 361.1533.

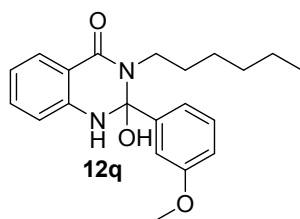

**3-Hexyl-2-hydroxy-2-(3-methoxy phenyl)-2, 3-dihydro quinazolin-4(1H) one (12q):** white solid, Yield-52 %,  $^1\text{H}$  NMR (400 MHz,  $\text{CDCl}_3$ ):  $\delta$  = 12.10 (s, 1H), 8.78 (d,  $J$ = 8.4 Hz, 1H), 7.49-7.47 (m, 2H), 7.42-7.38 (m, 2H), 7.34-7.28 (m, 1H), 7.08-7.05 (m, 2H), 6.51 (s, br, 1H), 3.87 (s, 3H), 3.44-3.41 (m, 2H), 1.63-1.60 (m, 2H), 1.38-1.24 (m, 6H), 0.89-0.86, (m, 3H);  $^{13}\text{C}$  NMR (100 MHz,  $\text{CDCl}_3$ ):  $\delta$ = 169.9, 165.4, 139.7, 136.3, 132.4, 129.7, 129.4, 126.4, 122.8, 120.8, 120.8, 119.1, 118.5, 112.4, 112.2, 53.4, 40.1, 31.4, 29.4, 26.6, 22.5, 13.9; MS (EI)  $m/z$ :186.26, 355.20(M+H) $^+$ , 731.30.

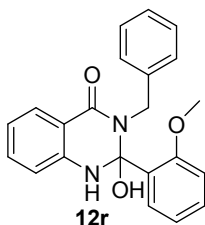

**3-Benzyl-2-hydroxy-2-(2-methoxy phenyl)-2,3-dihydro quinazolin-4(1H) one (12r):** Light green color solid, Yield-35 %,  $^1\text{H}$  NMR (400 MHz,  $\text{CDCl}_3$ ):  $\delta$  = 11.72 (s, 1H), 8.69 (d,  $J$ = 8.4 Hz, 1H), 7.50-7.44 (m, 3H), 7.35-7.25 (m, 7H), 7.18 (d,  $J$ = 1.2 Hz, 1H), 7.0 (d,  $J$ = 16Hz, 1H), 6.49 (s, br, 1H), 4.64-4.59 (m, 2H), 4.01 (s, 3H);  $^{13}\text{C}$  NMR (100 MHz,  $\text{CDCl}_3$ ):  $\delta$ = 169.1, 167.3, 165.4, 159.9, 159.7, 139.7, 136.3, 132.4, 129.7, 129.4, 126.4, 122.8, 121.5, 120.8, 119.1, 118.5, 118.3, 117.4, 112.4, 112.2, 55.4, 40.1; HRMS:  $m/z$  calcd for  $\text{C}_{22}\text{H}_{21}\text{N}_2\text{O}_3$  (M+H) 361.1552 found 361.1537.

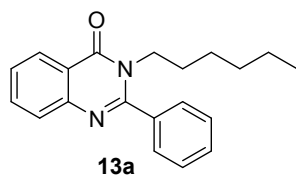

**3-Hexyl-2-phenyl quinazolin-4(3H)-one (13a):** Syrupy liquid,  $^1\text{H}$  NMR (400MHz,  $\text{CDCl}_3$ ):  $\delta$ =8.34 (d,  $J$  = 7.6 Hz, 1H), 8.11-8.09 (m, 1H), 7.78-7.72 (m, 2H), 7.54-7.49 (m, 5H), 3.99-3.95 (m, 2H), 1.63-1.56 (m, 2H), 1.20-1.07 (m, 6H), 0.84-0.78 (m, 3H);  $^{13}\text{C}$  NMR (100 MHz,  $\text{CDCl}_3$ ):  $\delta$  =162.16, 156.29, 147.15, 135.51, 134.29, 133.61, 130.15, 129.79, 128.74, 128.45, 127.79, 127.39, 126.97, 126.77, 45.94, 30.97, 28.55, 26.28, 22.30, 13.87;HRMS:  $m/z$  calcd for  $\text{C}_{20}\text{H}_{23}\text{N}_2\text{O}$  (M+H) 307.1810, found 307.1805.

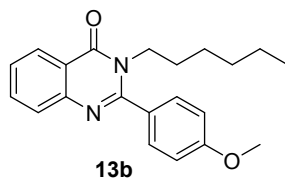

**3-Hexyl-2-(4-methoxyphenyl) quinazolin-4 (3H)-one (22):** Syrupy liquid,<sup>1</sup>H NMR (400MHz, CDCl<sub>3</sub>):8.32 (d, J= 7.2 Hz, 1H), 7.74 – 7.72 (m, 1H), 7.50-7.49 (m, 2H), 7.31-7.26 (m, 2H), 7.04-7.01 (m, 1H), 6.87-6.83 (m, 1H), 4.02-3.98 (m, 2H), 3.88 (s, 3H), 1.62-1.54 (m, 2H), 1.25-1.14 (m, 6H), 0.86-0.79 (m, 3H);<sup>13</sup>C NMR (100 MHz, CDCl<sub>3</sub>): δ= 162.33, 160.64, 156.18, 147.25, 134.19, 133.22, 134.19, 133.22, 128.04, 127.36, 126.76, 126.72, 120.83, 119.18, 114.16, 114.10, 55.43, 45.97, 31.04, 27.51, 26.31, 22.33, 13.89; HRMS: m/z calcd for C<sub>21</sub>H<sub>25</sub>N<sub>2</sub>O<sub>2</sub> (M+H) 337.1916, found 337.1916.

TDC-106 C383/C382/021 B

AR.No: MR1115/745

Analyst : Mallikarjun  
Solvent : cdcl3  
Date : Nov 9 2015  
NUCLEUS : 1H  
PFG (MHz): 400.22  
EXP : PROTON

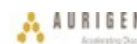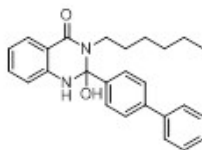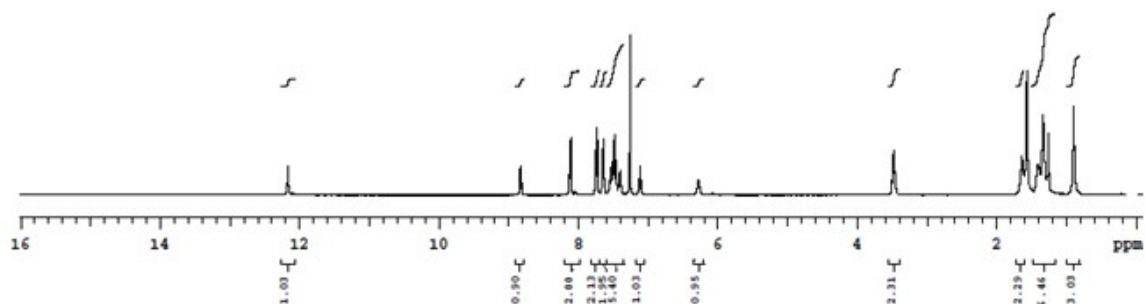

AN.No: ME1115/1930

Analyst : Mallikarjun  
Solvent : cdCl3  
Date : Nov 22 2015  
NUCLEUS : C13  
PPO (MHz): 100.65  
EXP : CARBON

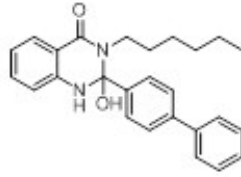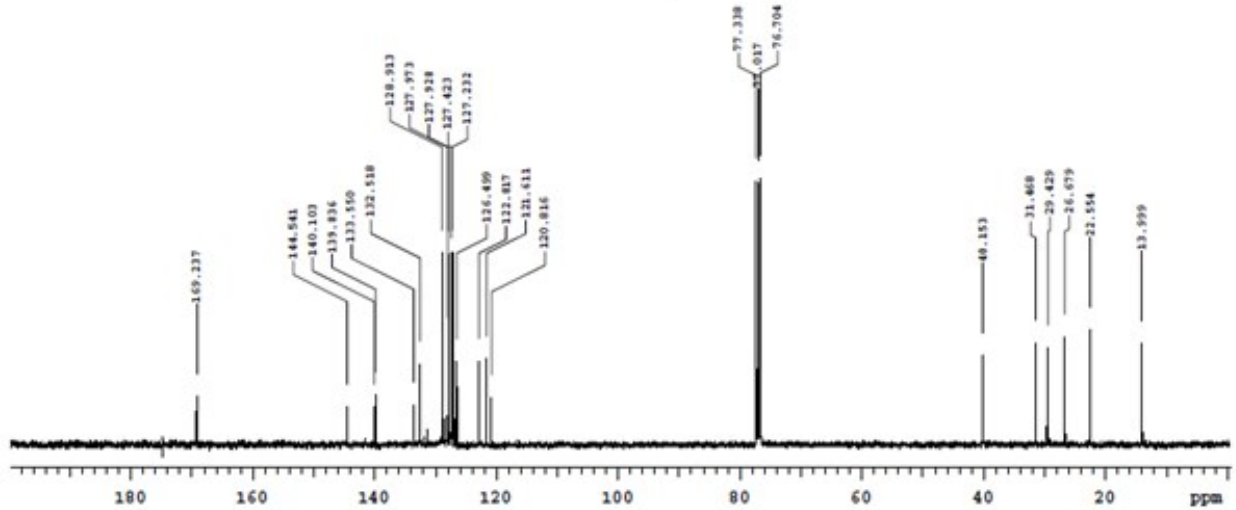

**Single Mass Analysis**

Tolerance = 5.0 PPM / DBE: min = -1.5, max = 100.0  
Element prediction: Off  
Number of isotope peaks used for i-FIT = 2

Monoisotopic Mass, Even Electron Ions  
42 formula(e) evaluated with 1 results within limits (up to 10 closest results for each mass)  
Elements Used:  
C: 0-30 H: 0-35 N: 0-3 O: 0-3  
C383/C3891/021 A  
151119008 34 (0.635) Cm (34:38)

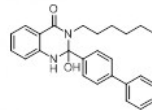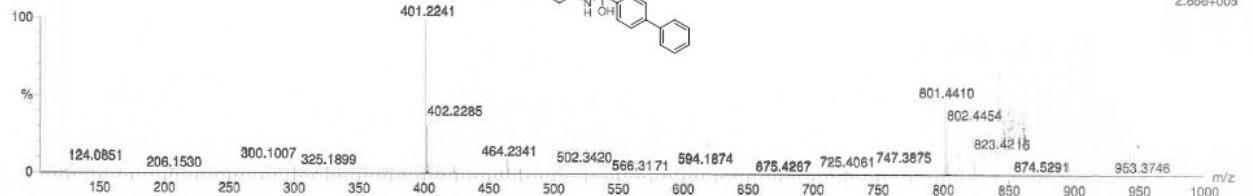

TOF MS ES+  
2.86e+005

| Mass     | Calc. Mass | mDa | PPM | DBE  | i-FIT | Formula       |
|----------|------------|-----|-----|------|-------|---------------|
| 401.2241 | 401.2229   | 1.2 | 3.0 | 13.5 | 33.6  | C26 H29 N2 O2 |

**DR.REDDY'S LABORATORIES LIMITED,CPS**  
Analytical Research Department

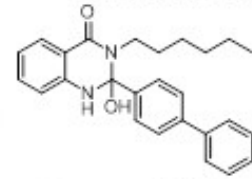

**Peak Table Graph**

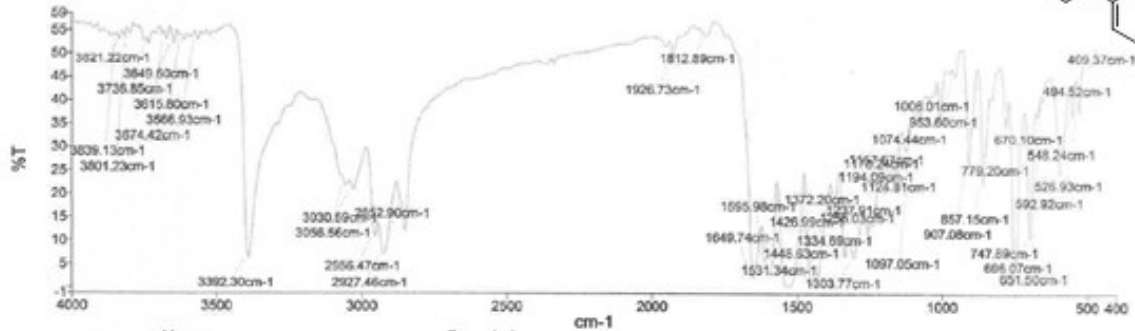

Name: C383-CJSR2-021\_1\_1 Description: Sample 016 By pet2 Date Friday, February 05 2016

Analyzed By: pet2  
Analyzed Date: 2/5/2016 8:00:55 PM

IPC-104 C383/C3881/041 Pt-2

A.R.No: MB0116/2274

Analyst : Mallikarjun  
Solvent : cdcl3  
Date : Jan 30 2016  
MPCLab : 81  
PW (MS): 400.22  
SZ : 880708

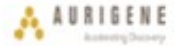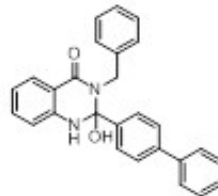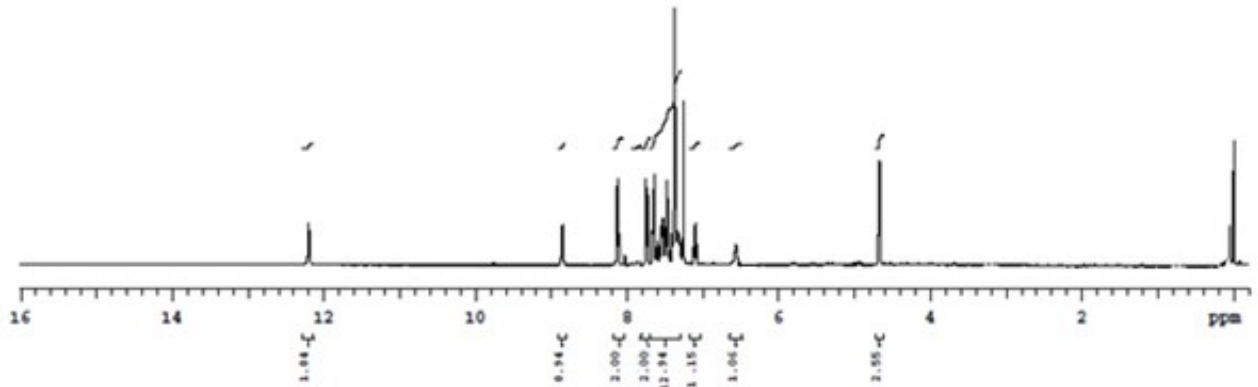

TDC-106 C383/CJSR1/041

AR.No: MB0115/630

Analyst : Mallikarjun  
Solvent : cdcl3  
Date : Jan 10 2016  
NUCLEUS : C13  
FREQ (MHz): 100.65  
EXP :

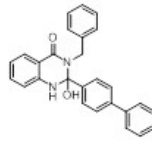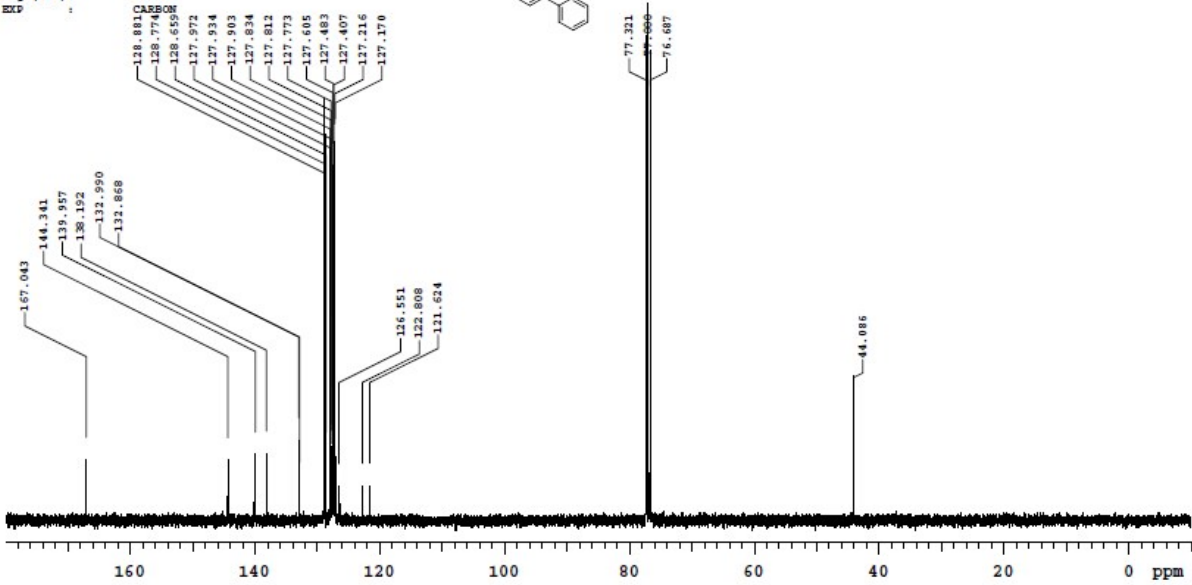

Elemental Composition Report

Single Mass Analysis

Tolerance = 5.0 PPM / DBE: min = -1.5, max = 100.0  
Element prediction: Off  
Number of isotope peaks used for i-FIT = 2

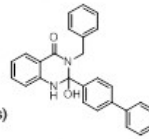

Monoisotopic Mass, Even Electron Ions  
32 formula(e) evaluated with 1 results within limits (up to 20 closest results for each mass)  
Elements Used:  
C: 0-30 H: 0-30 N: 0-3 O: 0-3  
C383/CJSR1/041  
151215015 19 (0.352) Cm (17.21-64.69x0.500)

1: TOF MS ES+  
2.14e+004

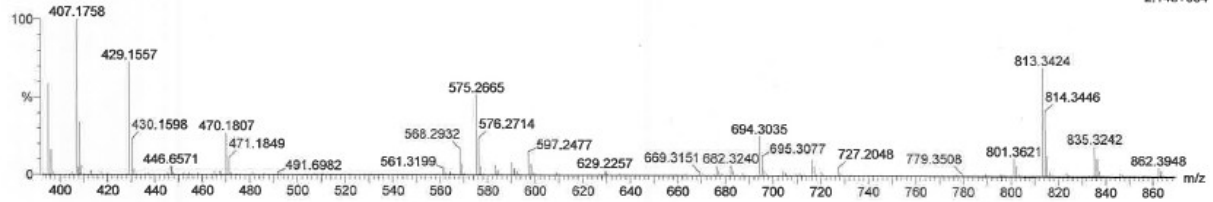

Minimum: 5.0 5.0 -1.5  
Maximum: 100.0 100.0

| Mass     | Calc. Mass | mDa  | PPM  | DBE  | i-FIT | Formula       |
|----------|------------|------|------|------|-------|---------------|
| 407.1758 | 407.1760   | -0.2 | -0.5 | 17.5 | 24.5  | C27 H23 N2 O2 |

R. Nagaraja  
09/10/2016

DDY'S LABORATORIES LIMITED,CPS  
Analytical Research Department

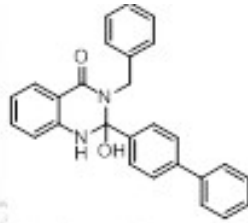

Peak Table Graph

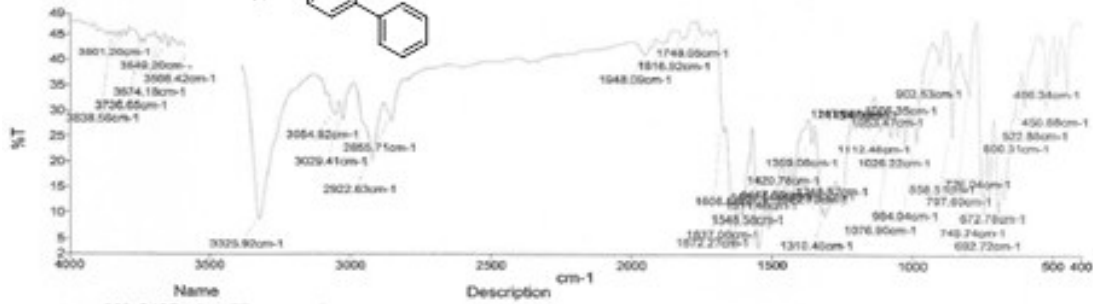

Name: c383-CJSR1-041-FR1\_1\_1 Description: Sample 011 By pet2 Date Friday, February 05 2016

Analyzed By: pet2  
Analyzed Date: 2/5/2016 7:40:24 PM  
Checked By:  
Checked Date:

TDC-106 C383/CJSR1/042 (Pr-1)

A.R.No: MS0116/2025  
Analyst : Mallikarjun  
Solvent : cdcl3  
Date : Feb 1 2016  
MOLECULE : H1  
FREQ (MHz) : 400.22  
EXP : PROTON

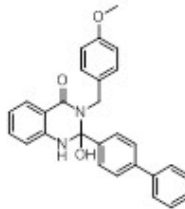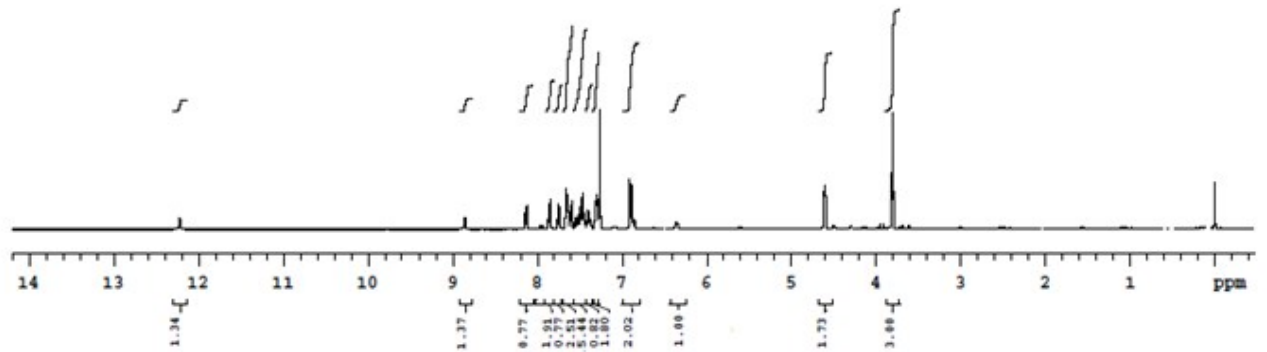



TDC-106 C383/CJSR1/042

AN.No: MRO116/431

Analyt : Mallikarjun  
Solvent : cdcl3  
Date : Jan 10 2016  
NUCLIDUS : C13  
FPO (MRS): 100.65  
EXP :

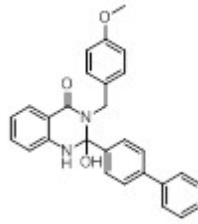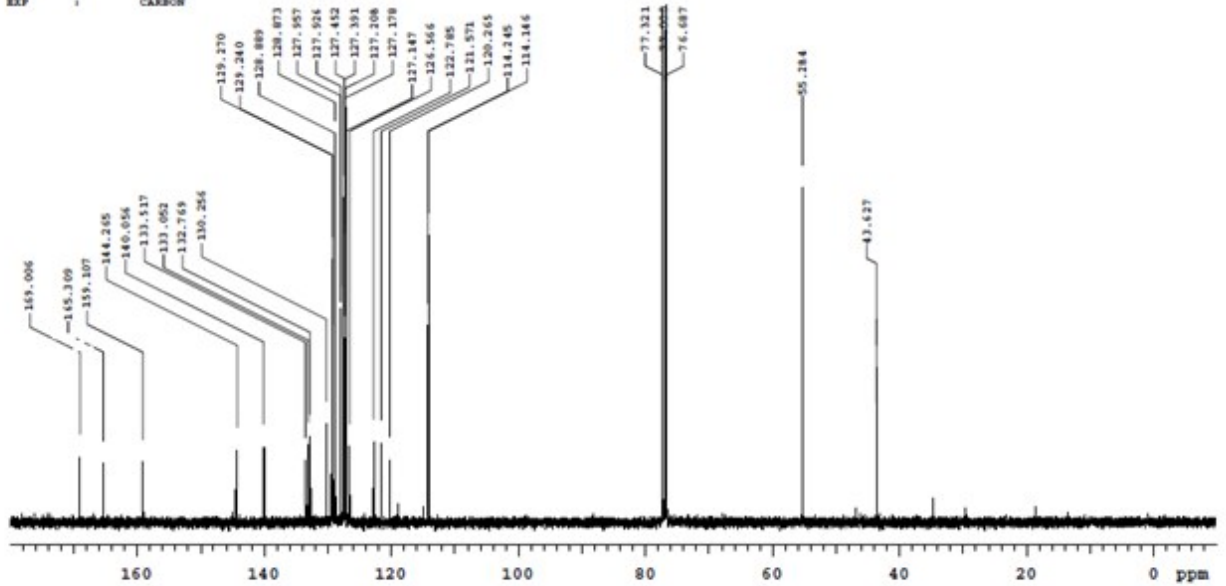

### Elemental Composition report

#### Single Mass Analysis

Tolerance = 5.0 PPM / DBE: min = -1.5, max = 100.0

Element prediction: Off

Number of isotope peaks used for i-FIT = 2

Monoisotopic Mass, Even Electron Ions

61 formula(e) evaluated with 1 results within limits (up to 10 closest results for each mass)

Elements Used:

C: 0-32 H: 0-35 N: 0-3 O: 0-5

C383/CJSR1/042

151222009 25 (0.472) Cm (25:28)

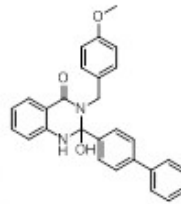

Page 1

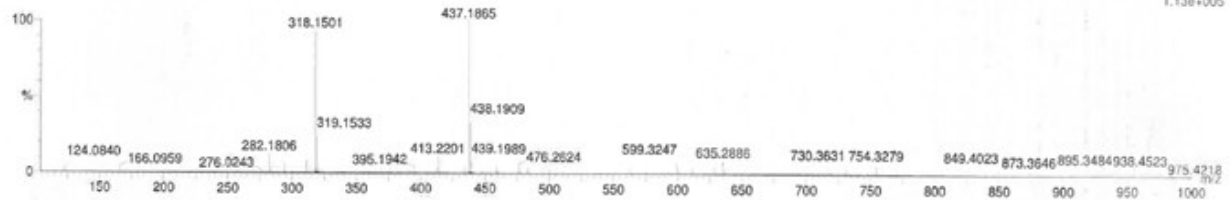

Minimum:

Maximum: 5.0 5.0 -1.5 100.0

| Mass     | Calc. Mass | mDa | PPM | DBE  | i-FIT | Formula       |
|----------|------------|-----|-----|------|-------|---------------|
| 437.1865 | 437.1865   | 0.0 | 0.0 | 17.5 | 2.6   | C28 H25 N2 O3 |

1: TOF MS ES+  
1.13e+005

**EDDY'S LABORATORIES LIMITED, CPS**  
 Analytical Research Department

Peak Table Graph

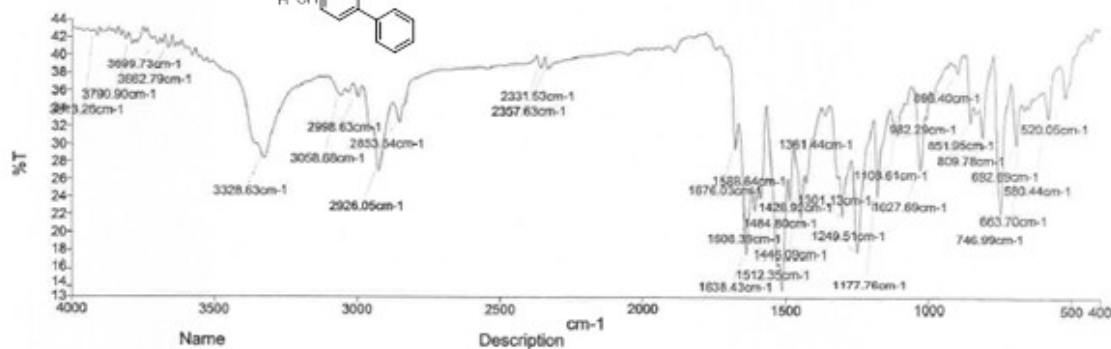

Name: C383-CJSR1-042-FR2\_1\_1 Description: Sample 014 By pet2 Date Friday, February 05 2016

Analyzed By: pet2  
 Analyzed Date: 2/5/2016 7:54:57 PM

TDC-106 C383/C0881/043

AR.No: MR1215/1714

Analyt : Mallikarjun  
 solvent : cdcl3  
 Date : Dec 17 2015  
 MOLECULE : H2  
 PRG (MRA) : 400.22  
 EXP : PROTON

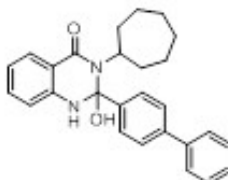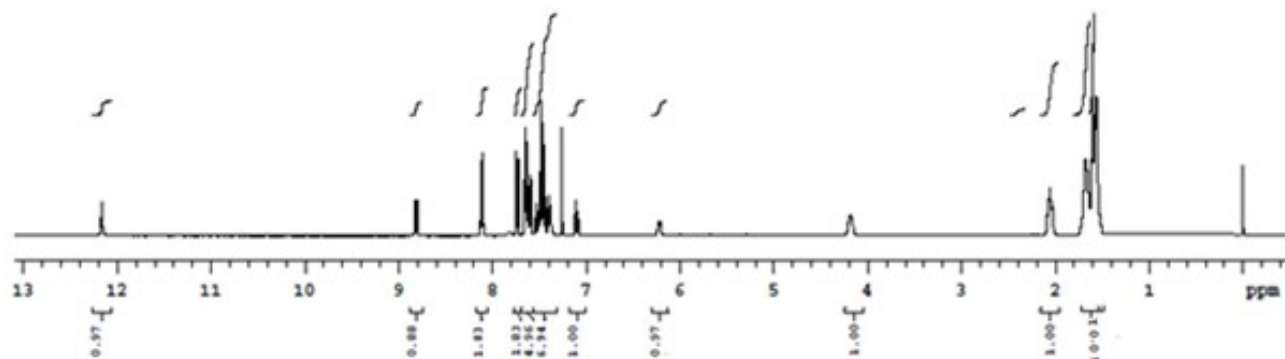

TDC-106 C383-CJSR1-043

AR.No: ME0116/20

Analyst : Mallikarjun  
 Solvent : cdcl3  
 Date : Jan 2 2016  
 NUCLEUS : C13  
 FREQ (MHz) : 100.63  
 EXP :

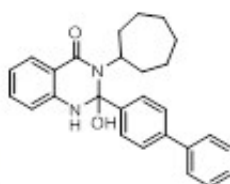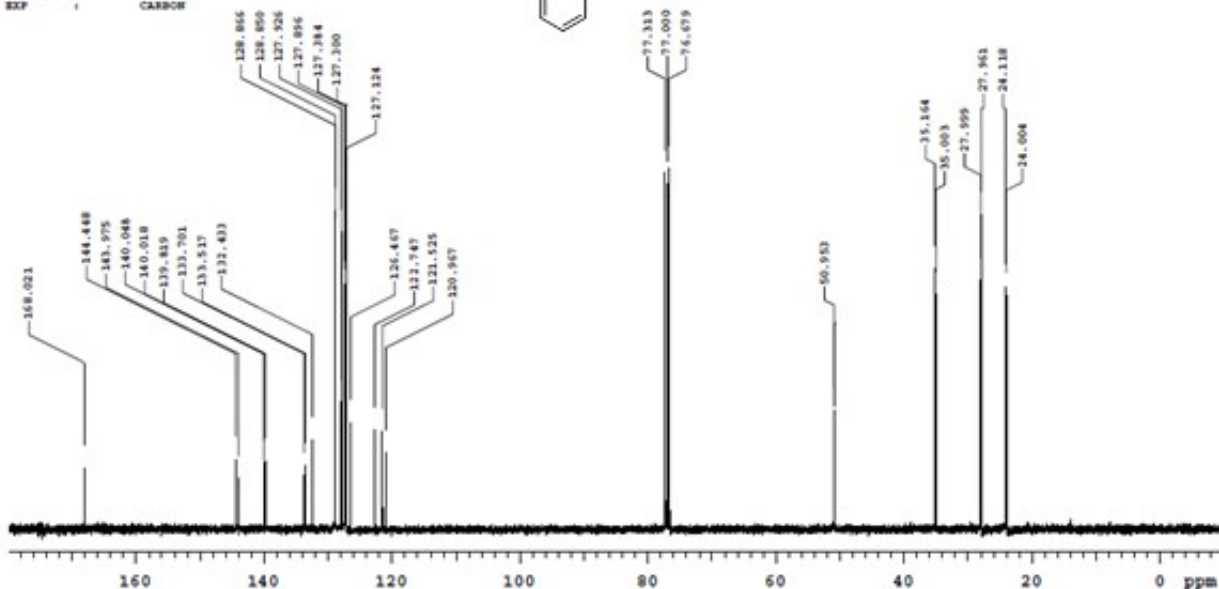

**Single Mass Analysis**

Tolerance = 5.0 PPM / DBE: min = -1.5, max = 100.0

Element prediction: Off

Number of isotope peaks used for i-FIT = 2

Monoisotopic Mass, Even Electron Ions

72 formula(e) evaluated with 1 results within limits (up to 10 closest results for each mass)

Elements Used:

C: 0-32 H: 0-35 N: 0-3 O: 0-5

C383/CJSR1/043

151222008 20 (0.365) Cm (18:20)

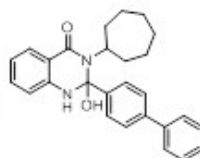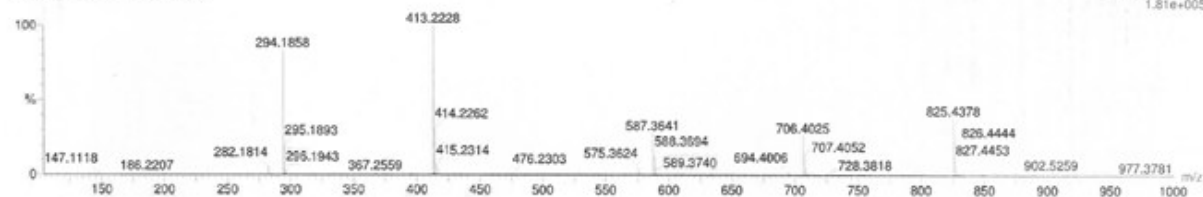

1: TOF MS ES+  
 1.81e+005

| Mass     | Calc. Mass | mDa  | PPM  | DBE  | i-FIT | Formula       |
|----------|------------|------|------|------|-------|---------------|
| 413.2228 | 413.2229   | -0.1 | -0.2 | 14.5 | 1.5   | C27 H29 N2 O2 |

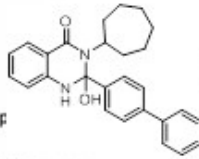

**DR.REDDY'S LABORATORIES LIMITED,CPS**  
Analytical Research Department

Peak Table Graph

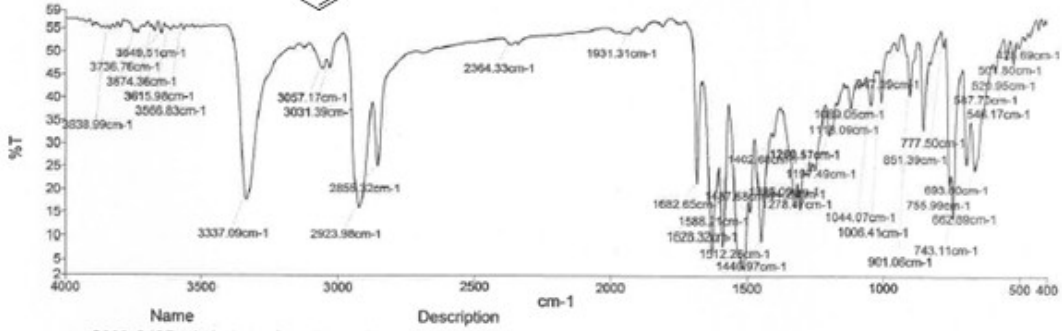

Name: C383-CJSR1-043\_1\_1 Description: Sample 017 By pet2 Date: Friday, February 05 2016

Analyzed By: pet2  
Analyzed Date: 2/5/2016 8:03:39 PM

TDC-166 C383/CJSR1/044

AR.No: MR1215/2281

Analyst : Mallikarjun  
Solvent : cdcl3  
Date : Dec 24 2015  
METHOD : 81  
PROC (MR): 400.22  
EXP : PROTON

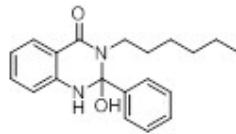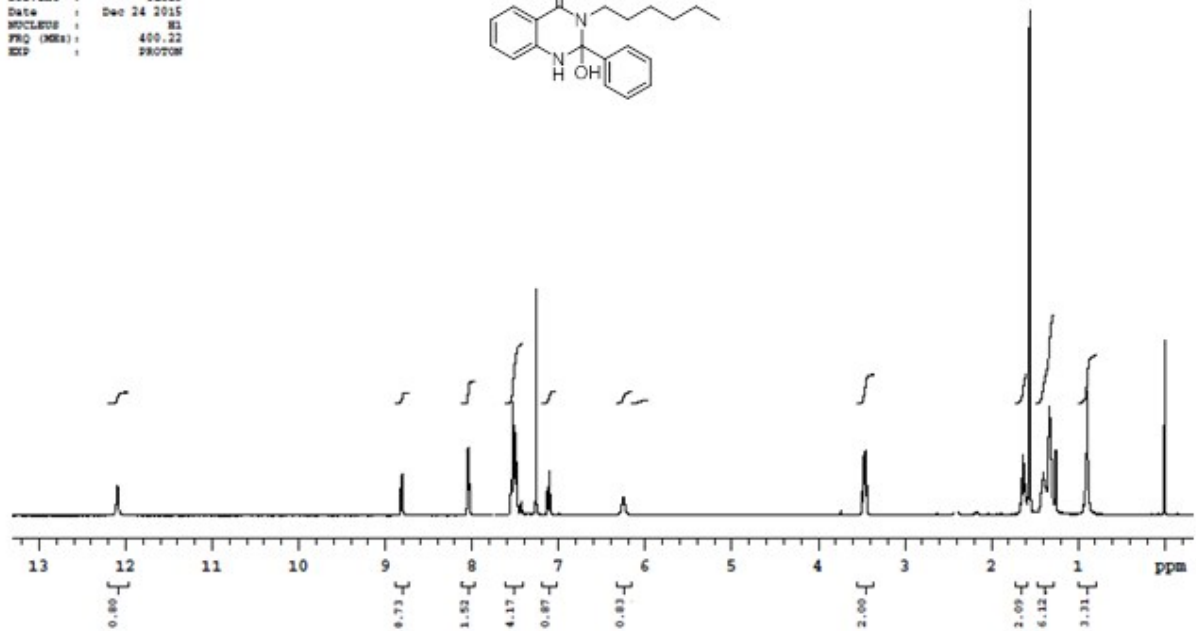

TDC-104 C383/CJSR1/044

AR.No: M00116/632

Analyst : Mallikarjun  
Solvent : cdcl3  
Date : Jan 10 2016  
INSTRUM : CI3  
FREQ (MHz): 100.65  
EXP :

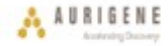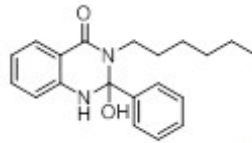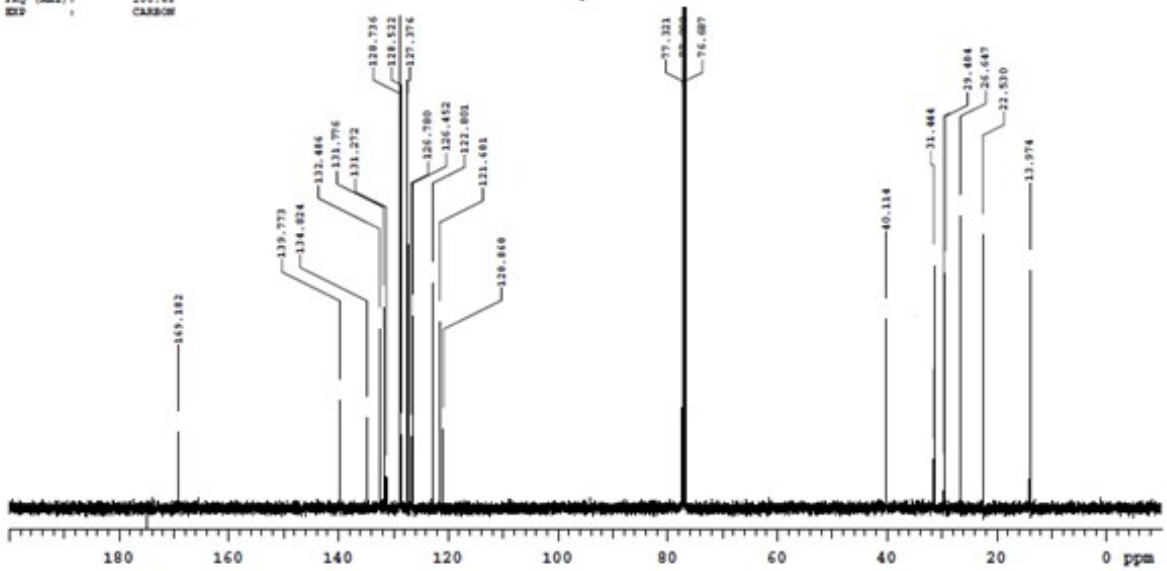

### Elemental Composition Report

Page 1

#### Single Mass Analysis

Tolerance = 5.0 PPM / DBE: min = -1.5, max = 100.0

Element prediction: Off

Number of isotope peaks used for i-FIT = 2

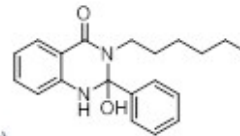

Monoisotopic Mass, Even Electron Ions

29 formula(e) evaluated with 1 results within limits (up to 10 closest results for each mass)

Elements Used:

C: 0-22 H: 0-26 N: 0-3 O: 0-4

C383/CJSR1/044

160204011 19 (0.352) Cm (19:20-47:53x0.500)

1: TOF MS ES+  
8.48e+005

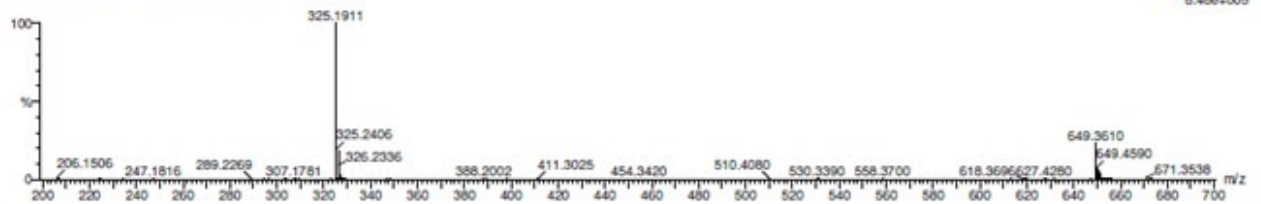

Minimum: -1.5  
Maximum: 5.0 5.0 100.0

| Mass     | Calc. Mass | mDa  | PPM  | DBE | i-FIT  | Formula       |
|----------|------------|------|------|-----|--------|---------------|
| 325.1911 | 325.1916   | -0.5 | -1.5 | 9.5 | 5752.5 | C20 H25 N2 O2 |

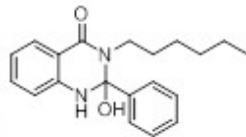

PerkinElmer Spectrum ES Version 10.03.08  
Friday, February 05, 2016 7:58 PM

**DR.REDDY'S LABORATORIES LIMITED,CPS**  
Analytical Research Department

**Peak Table Graph**

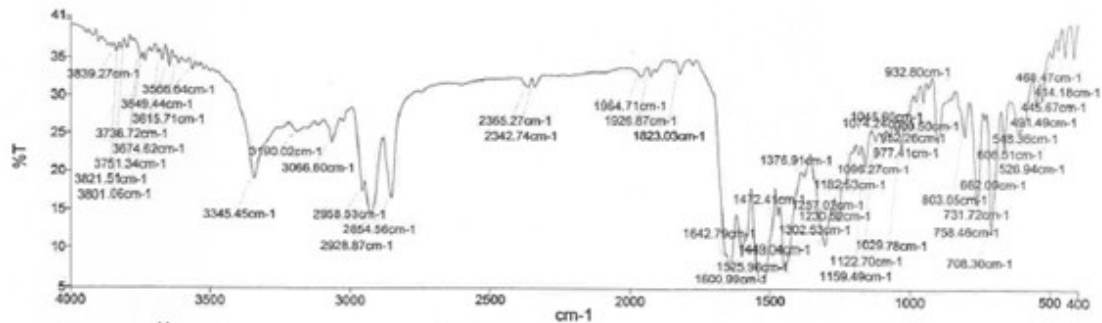

Name: C383-CJSR1-044\_1\_1 Description: Sample 015 By pet2 Date Friday, February 05 2016

Analyzed By: pet2  
Analyzed Date: 2/5/2016 7:57:43 PM

TRC-106 C383/CJSR1/045 (Fr-2)

AR.No: MR1215/2465

Analyt : Mallikarjun  
Solvent : cdcl3  
Date : Dec 29 2015  
MOLECULE : 83  
FREQ (MHz) : 400.22  
EXP : PROTON

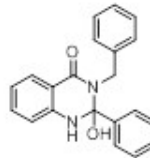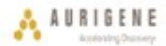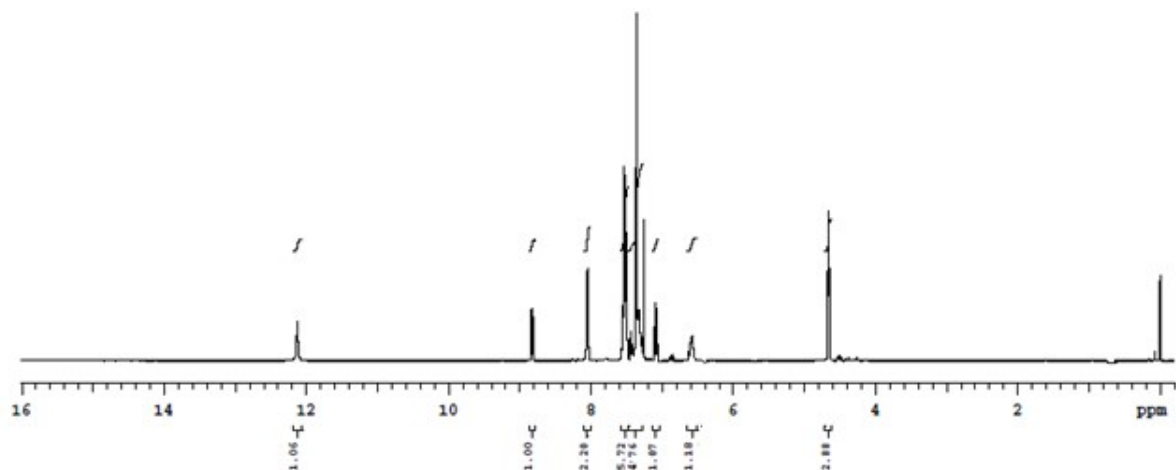

TRC-166 C383/CJSR1/045

A.R.No: M0216/527

Analyst : Mallikarjun  
Solvent : cdcl3  
Date : Feb 7 2016  
Molecular Weight : 244.33  
MW (Mn): 244.33  
MW (Mn) : 244.33

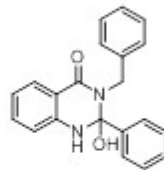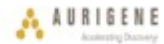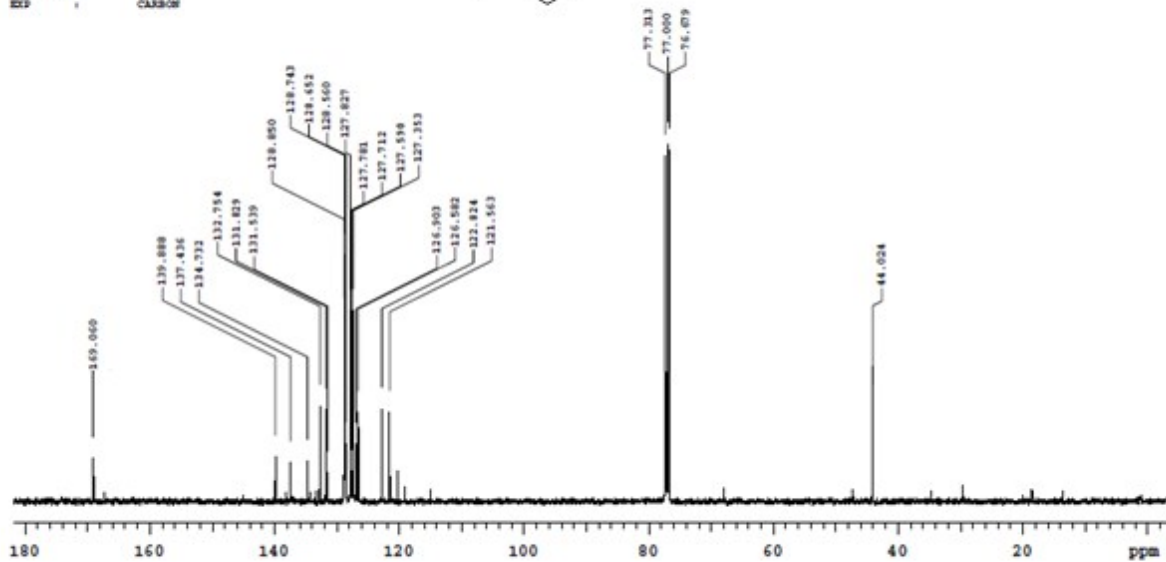

### Elemental Composition Report

Page 1

#### Single Mass Analysis

Tolerance = 5.0 PPM / DBE: min = -1.5, max = 100.0

Element prediction: Off

Number of isotope peaks used for i-FIT = 2

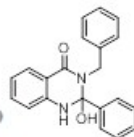

Monoisotopic Mass, Even Electron Ions

28 formulae evaluated with 1 results within limits (up to 10 closest results for each mass)

Elements Used:

C: 0-22 H: 0-26 N: 0-3 O: 0-4

C383/CJSR1/045

160204012 24 (0.440) Cm (24:25-42:44x0.500)

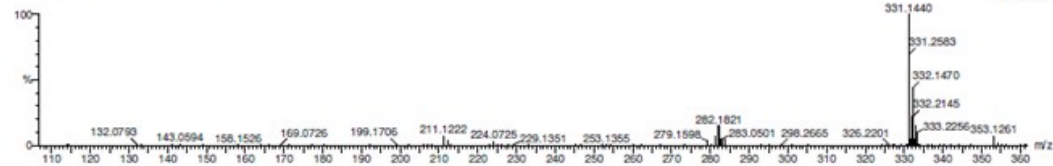

1: TOF MS ES+  
6.48e+003

| Mass     | Calc. Mass | mDa  | PPM  | DBE  | i-FIT | Formula       |
|----------|------------|------|------|------|-------|---------------|
| 331.1440 | 331.1447   | -0.7 | -2.1 | 13.5 | 240.4 | C21 H19 N2 O2 |

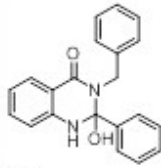

PerkinElmer Spectrum ES Version 10.03.08  
Friday, February 05, 2016 8:21 PM

**DR.REDDY'S LABORATORIES LIMITED,CPS**  
Analytical Research Department

Peak Table Graph

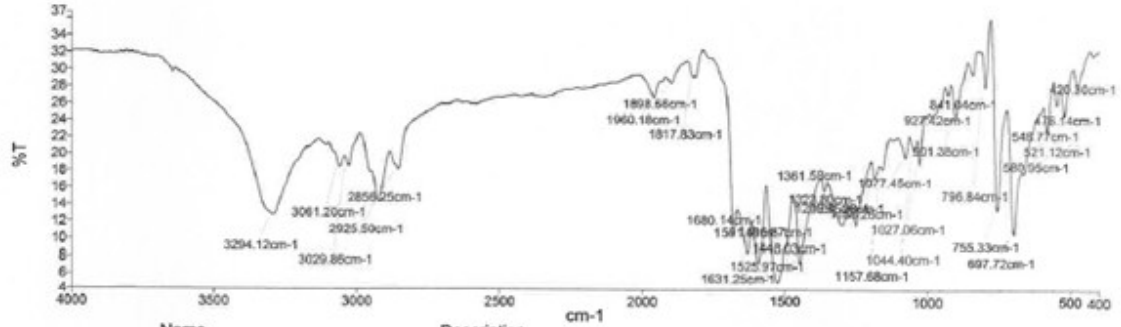

Name: C383-CJSR1-045\_1  
Description: Sample 020 By pet2 Date Friday, February 05 2016

Analyzed By: pet2  
Analyzed Date: 2/5/2016 8:19:12 PM

TDC166 C383-CJSR1-047

AN.No: MB0116/12

Analyte : Mallikarjun  
Solvent : cdcl3  
Date : Jan 4 2016  
MOLECULE : H1  
PROC (MHR) : 400.22  
EXP : PROTON

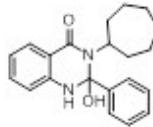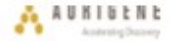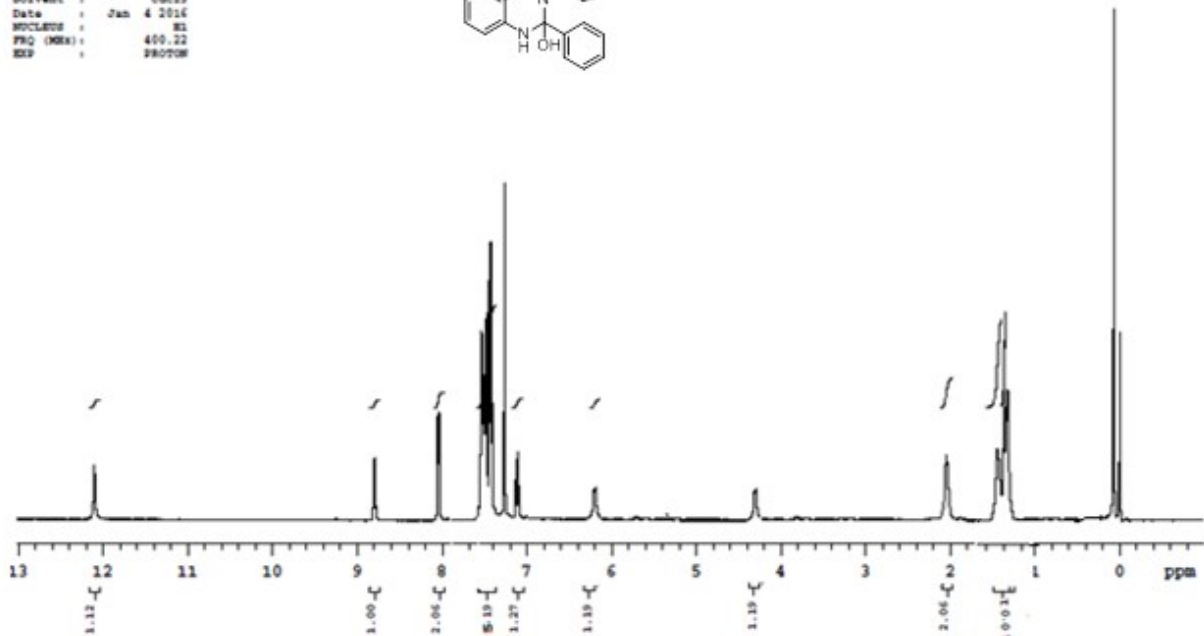



TDC-106 C383/C2881/047

AK.No: MS0116/633

Analyte : Mallikarjun  
Solvent : cdcl3  
Date : Jan 10 2016  
MOLECULE : C13  
FREQ (MHz) : 100.65  
EXP :

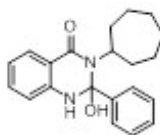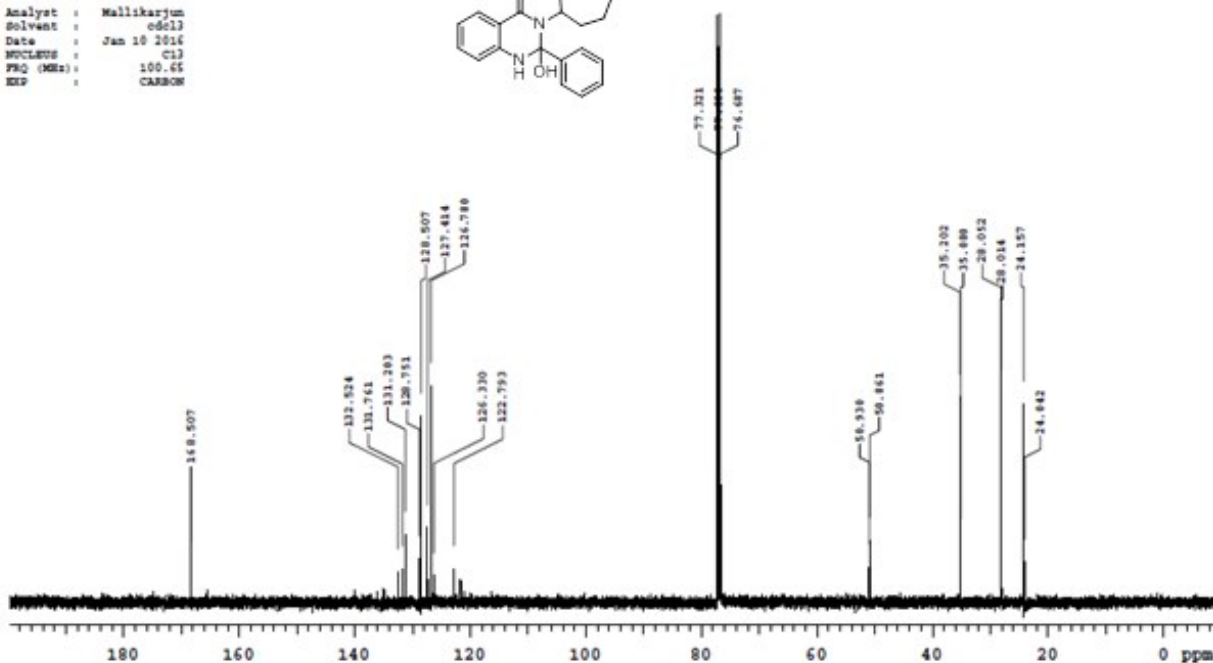

### Elemental Composition Report

#### Single Mass Analysis

Tolerance = 10.0 PPM / DBE: min = -1.5, max = 100.0

Element prediction: Off

Number of isotope peaks used for i-FIT = 2

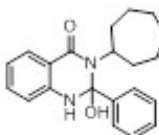

Monoisotopic Mass, Even Electron Ions

46 formula(e) evaluated with 1 results within limits (up to 5 closest results for each mass)

Elements Used:

C: 0-25 H: 0-30 N: 0-3 O: 0-4

C383/C2881/047

160204003 25 (0.472) Cm (25-53x0.500)

Page 1

1: TOF MS ES+  
6.93e+004

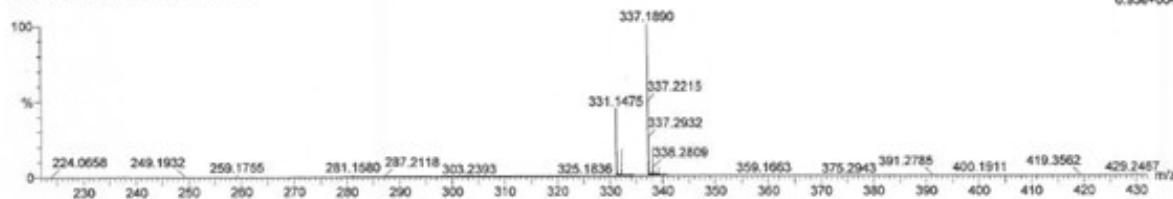

| Minimum: |            |      |      | -1.5  |       |               |  |
|----------|------------|------|------|-------|-------|---------------|--|
| Maximum: |            | 5.0  | 10.0 | 100.0 |       |               |  |
| Mass     | Calc. Mass | mDa  | PPM  | DBE   | i-FIT | Formula       |  |
| 337.1890 | 337.1916   | -2.6 | -7.7 | 10.5  | 507.1 | C21 H25 N2 O2 |  |

R. Nagarajan  
2/10/2016

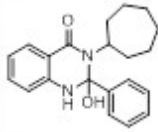

**DR.REDDY'S LABORATORIES LIMITED,CPS**  
Analytical Research Department

Peak Table Graph

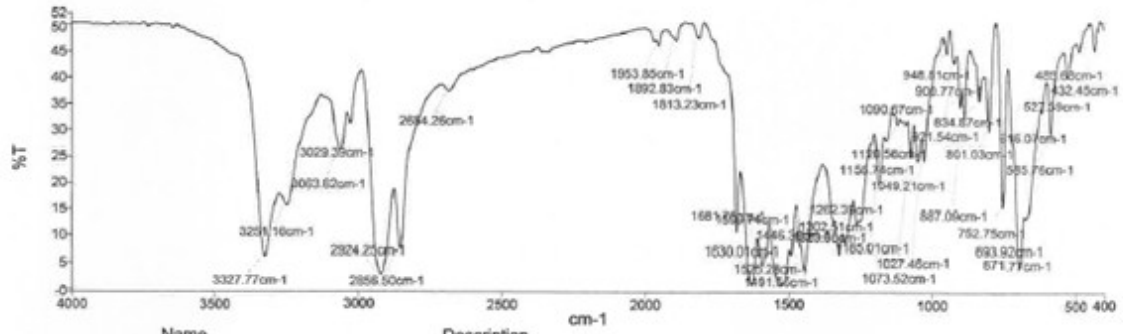

Name: C383-CJSR1-047\_1\_1      Description: Sample 018 By pet2 Date Friday, February 05 2016

Analyzed By: pet2  
Analyzed Date: 2/5/2016 8:12:08 PM

TDC-104 C383-CJ8K1-048-Pr-1

AN.No: ME1215/2761

Analyte : Mallikarjun  
Solvent : cdcl3  
Date : Dec 30 2015  
NUCLEUS : N1  
PPO (MHz): 400.22  
EXP : PROTON

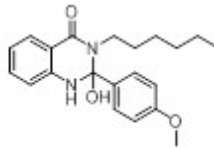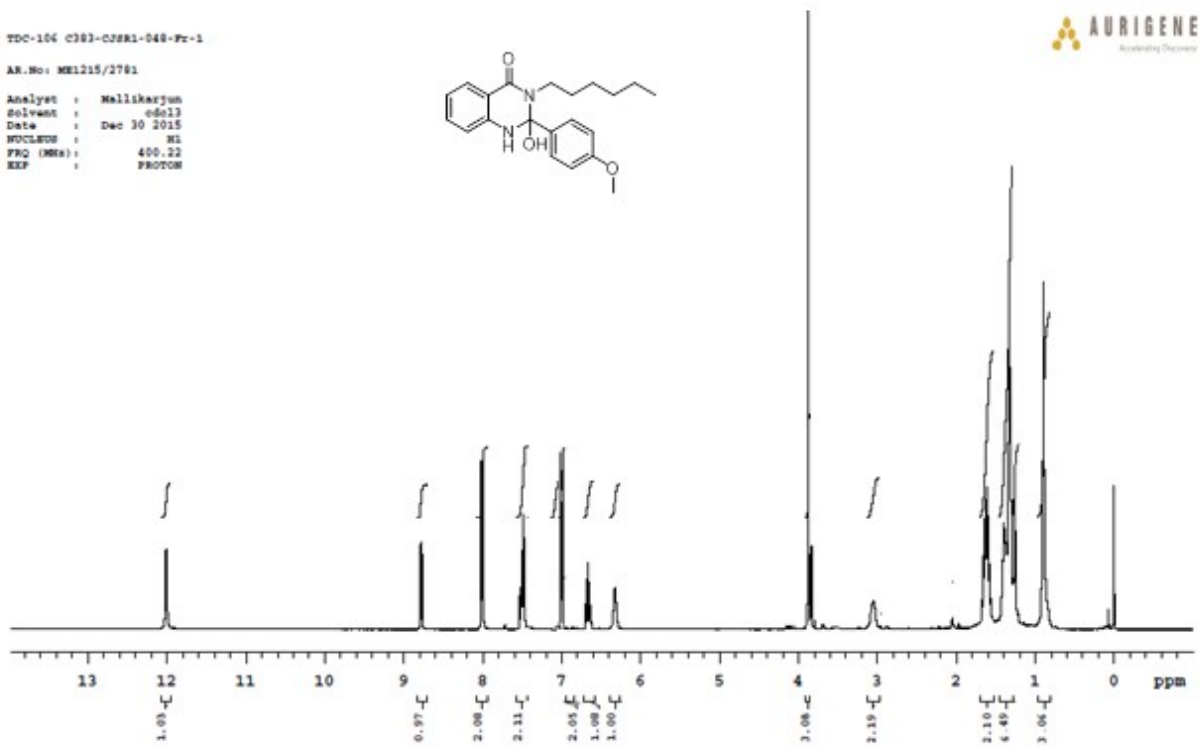

AURIGENE  
Accelerating Discovery

TDC-104 C383-CJ8K1/048

AN.No: ME0116/432

Analyte : Mallikarjun  
Solvent : cdcl3  
Date : Jan 10 2016  
NUCLEUS : C13  
PPO (MHz): 100.62  
EXP : CARBON

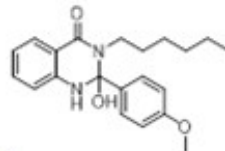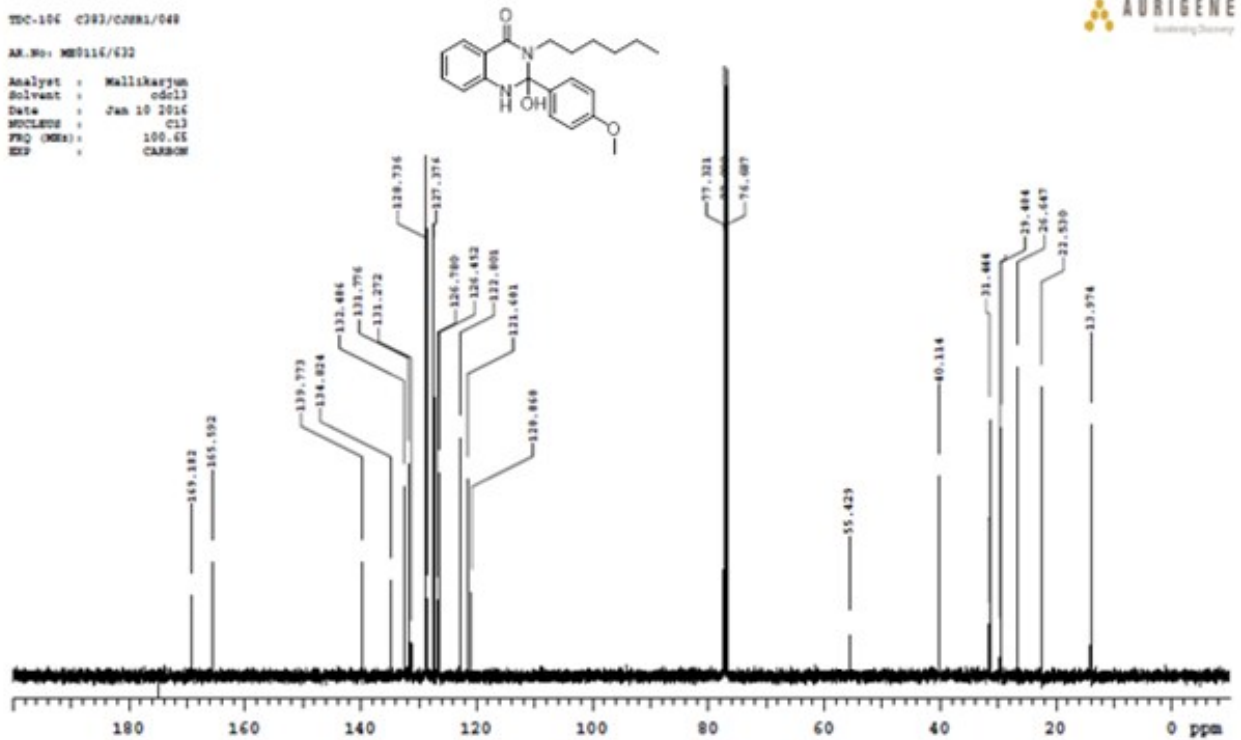

AURIGENE  
Accelerating Discovery

**Elemental Composition Report**

**Single Mass Analysis**

Tolerance = 5.0 PPM / DBE: min = -1.5, max = 100.0  
 Element prediction: C11  
 Number of isotope peaks used for i-FIT = 2

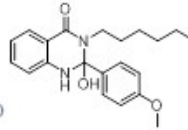

Monoisotopic Mass, Even Electron Ions  
 22 formula(e) evaluated with 1 results within limits (up to 10 closest results for each mass)  
 Elements Used:  
 C: 0.22 H: 0.29 N: 0.3 O: 0.4  
 C353J.SR1/048  
 160204014 19 (0.352) Cm (18.21-73.80x0.500)

1: TOF MS ES+  
 1.22e+006

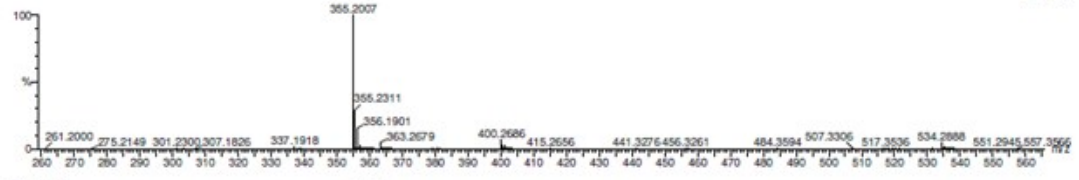

| Mass     | Calc. Mass | mDa  | PPM  | DBE | i-FIT    | Formula       |
|----------|------------|------|------|-----|----------|---------------|
| 355.2007 | 355.2022   | -1.5 | -4.2 | 9.5 | 328435.5 | C21 H27 N2 O3 |

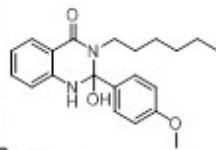

PerkinElmer Spectrum ES Version 10.03.08  
 Friday, February 05, 2016 8:04 PM

**DR.REDDY'S LABORATORIES LIMITED,CPS**  
 Analytical Research Department

**Peak Table Graph**

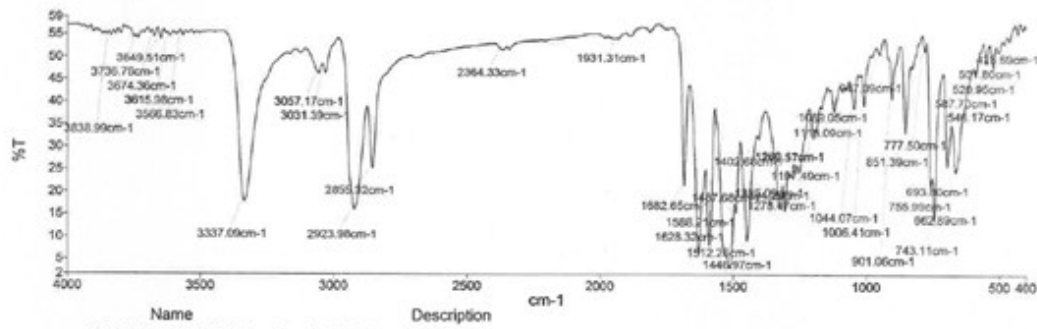

TDC106 C383-C3881-049

AR.No: ME0116/53

Analyst : Mallikarjun  
Solvent : cdcl3  
Date : Jan 4 2016  
NUCLEUS : 1H  
PFG (MHz) : 400.32  
EXP : 2SHOTW

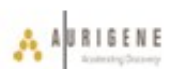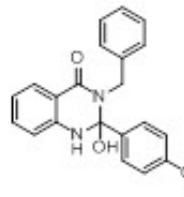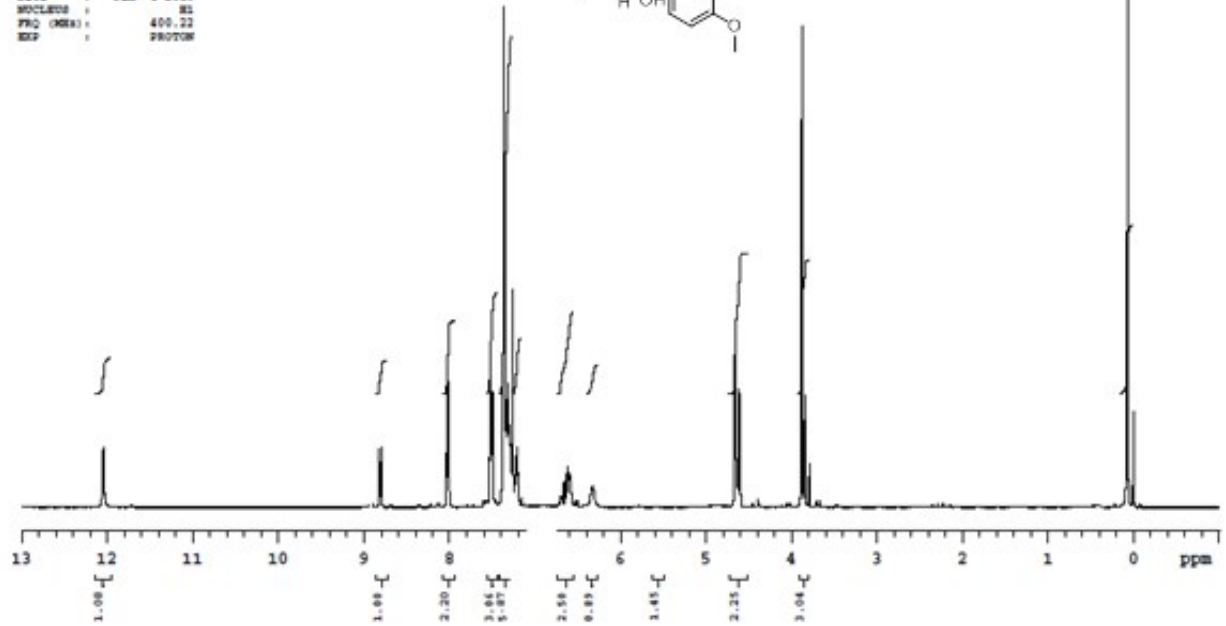

TDC-106 C383/C3881/049

AR.No: ME0116/534

Analyst : Mallikarjun  
Solvent : cdcl3  
Date : Jan 10 2016  
NUCLEUS : C13  
PFG (MHz) : 100.65  
EXP : CARBON

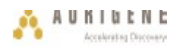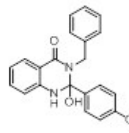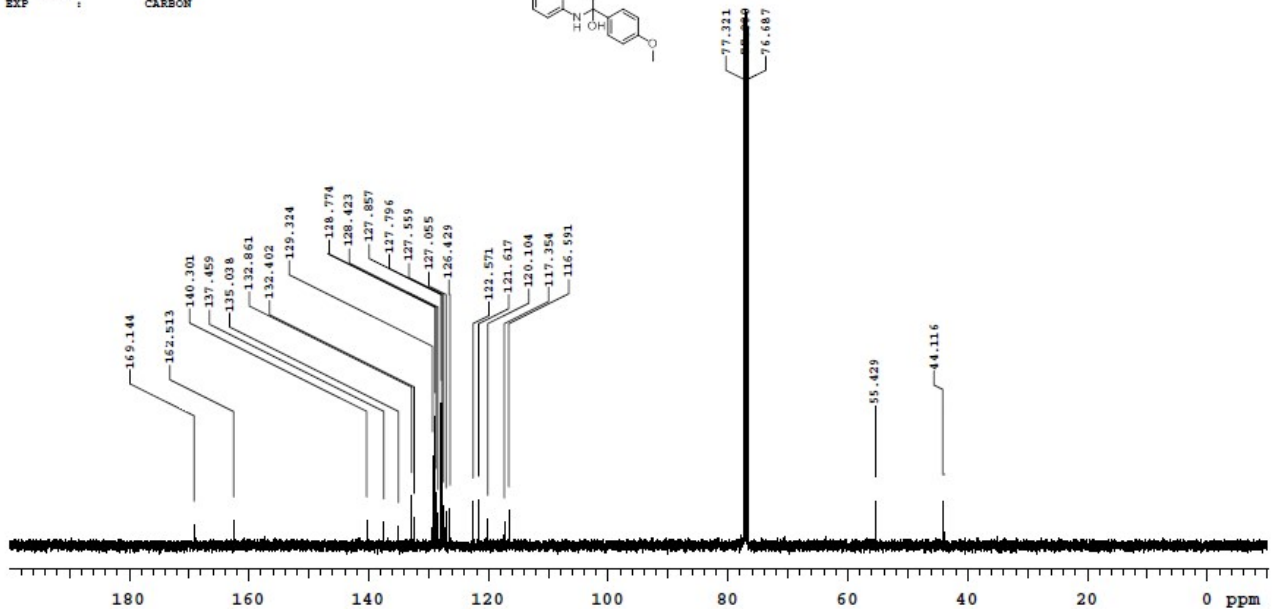

Elemental Composition Report

Single Mass Analysis

Tolerance = 5.0 PPM / DBE: min = -1.5, max = 100.0  
 Element prediction: Off  
 Number of isotope peaks used for i-FIT = 2

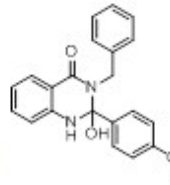

Monoisotopic Mass, Even Electron Ions  
 34 formula(e) evaluated with 1 results within limits (up to 10 closest results for each mass)  
 Elements Used:  
 C: 0-25 H: 0-29 N: 0-3 O: 0-4  
 C383/GJSR1/049  
 160204015.7 (0.131) Cm (7-24x0.500)

1: TOF MS ES+  
 1.92e+005

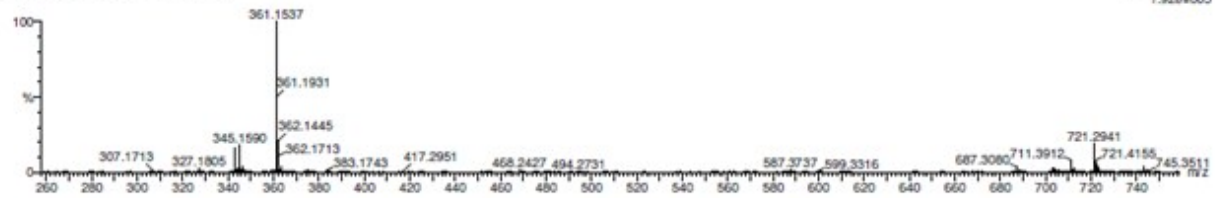

| Mass     | Calc. Mass | mDa  | PPM  | DBE  | i-FIT   | Formula       |
|----------|------------|------|------|------|---------|---------------|
| 361.1537 | 361.1552   | -1.5 | -4.2 | 13.5 | 12316.0 | C22 H21 N2 O3 |

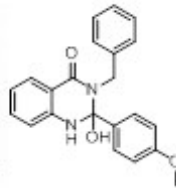

PerkinElmer Spectrum ES Version 10.03.08  
 Friday, February 05, 2016 8:13 PM

DR.REDDY'S LABORATORIES LIMITED,CPS  
 Analytical Research Department

Peak Table Graph

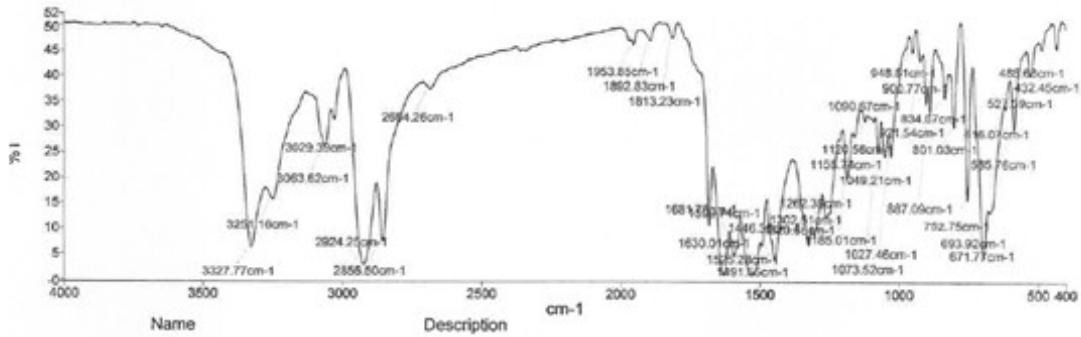

TDC-106 C302/C08R1/050 Pr-2

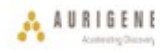

AN.No: MB0116/335

Analyte : Mallikarjun  
Solvent : cdcl3  
Date : Jan 6 2016  
NUCLEUS : H1  
PFG (MHz): 400.22  
EXP : PROTON

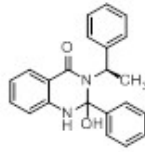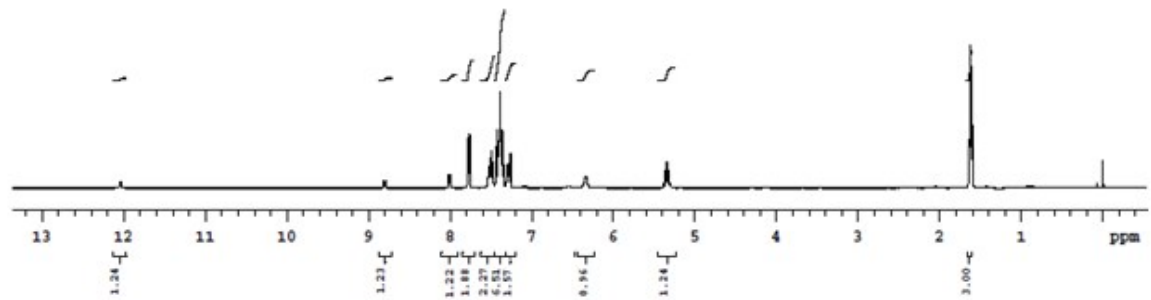

TDC-106 C302/C08R1/050

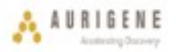

A.N.No: MB0216/362

Analyte : Mallikarjun  
Solvent : cdcl3  
Date : Feb 10 2016  
NUCLEUS : C13  
PFG (MHz): 100.65  
EXP : CARBON

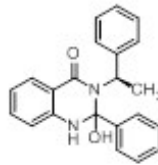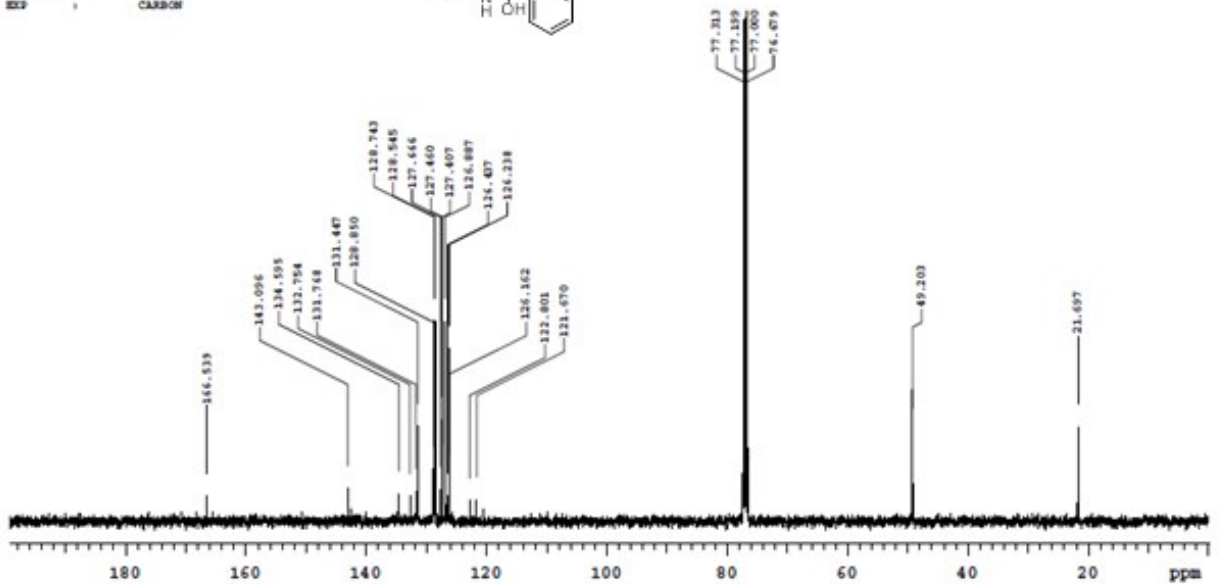

**Elemental Composition Report**

**Single Mass Analysis**

Tolerance = 5.0 PPM / DBE: min = -1.5, max = 100.0  
 Element prediction: Off  
 Number of isotope peaks used for i-FIT = 2

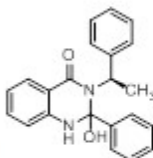

Monoisotopic Mass, Even Electron Ions  
 80 formula(e) evaluated with 1 results within limits (up to 10 closest results for each mass)  
 Elements Used:  
 C: 0-24 H: 0-29 N: 0-5 O: 0-5  
 C383/CJSR1/050  
 160204018 19 (0.352) Cm (17:19-25:27x0.500)

1: TOF MS ES+  
 3.48e+005

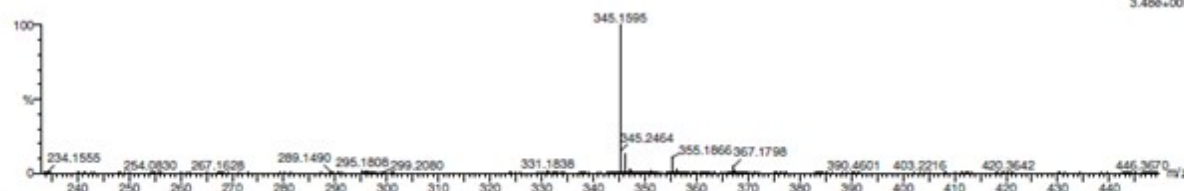

| Minimum: |            |      |       |      |         |               |
|----------|------------|------|-------|------|---------|---------------|
| Maximum: | 5.0        | 5.0  | 100.0 |      |         |               |
| Mass     | Calc. Mass | mDa  | PPM   | DBE  | i-FIT   | Formula       |
| 345.1595 | 345.1603   | -0.8 | -2.3  | 13.5 | 14251.7 | C22 H21 N2 O2 |

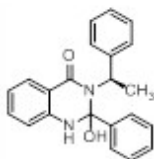

PerkinElmer Spectrum ES Version 10.03.08  
 Friday, February 05, 2016 8:24 PM

**DR.REDDY'S LABORATORIES LIMITED,CPS**  
 Analytical Research Department

**Peak Table Graph**

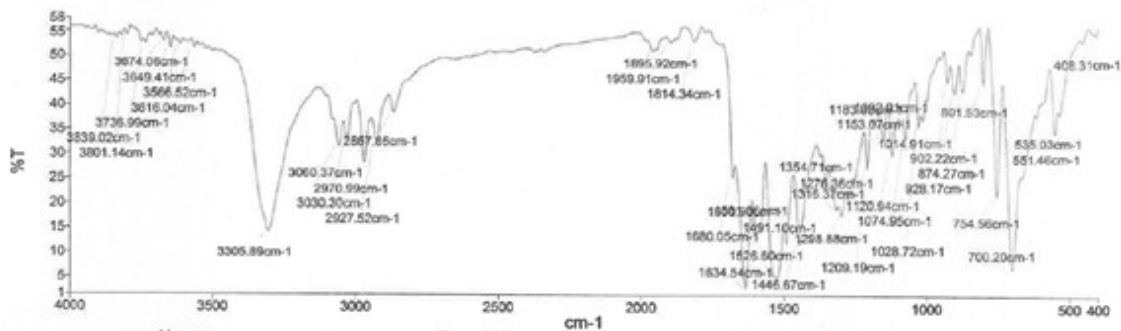

Name: C383-CJSR1-050\_1\_1 Description: Sample 021 By pet2 Date Friday, February 05 2016



YDC-104 (383/COM1/051/PV-1)

AN.No: MS0110/492

Analyte : Melikarjuna

Solvent : cdCl3

Date : Jan 7 2016

MOLEC.WT : 31

PKC (MW) : 400.32

EXP : 280008

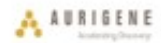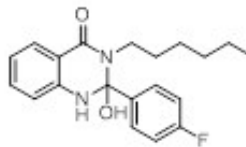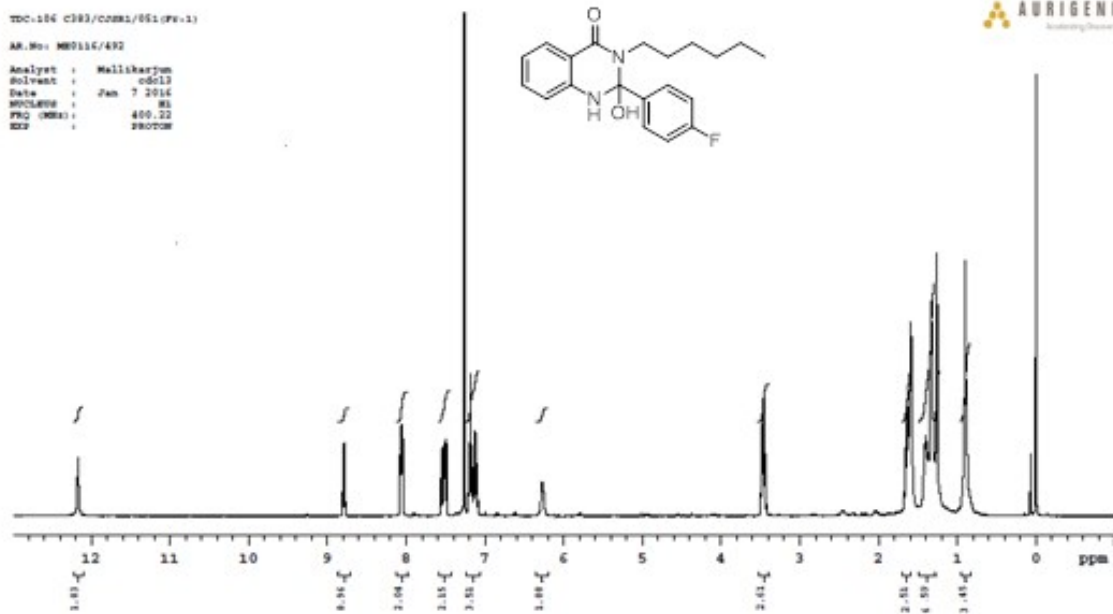

TOF MS (ESI) (09/11/16)  
 A.S.No: 480235/125  
 Analyte: 480235/125  
 Method: MS  
 Date: Feb 7 2016  
 Operator: S.D.  
 STD Name: 100.05  
 MSF: 000001

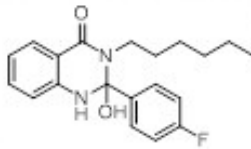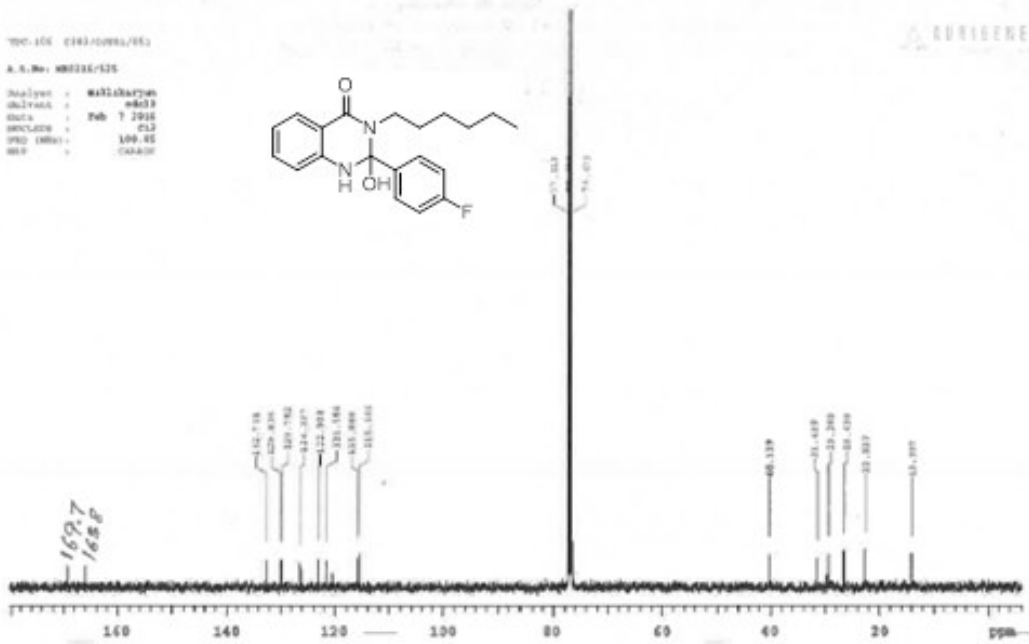

**Elemental Composition Report**

**Single Mass Analysis**

Tolerance = 6.0 PPM / DBE: min = -1.5, max = 100.0  
 Element prediction: Off  
 Number of isotope peaks used for i-FIT = 2

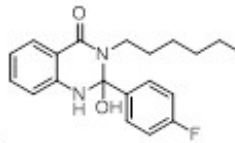

Monoisotopic Mass, Even Electron Ions  
 88 formula(e) evaluated with 1 results within limits (up to 5 closest results for each mass)  
 Elements Used:  
 C: 0-22 H: 0-30 N: 0-4 O: 0-4 F: 0-1  
 C38H38N2O2F  
 160204007 30 (0.560) Cm (29.32-62.56±0.500)

1: TOF MS ES+  
 1.42e+005

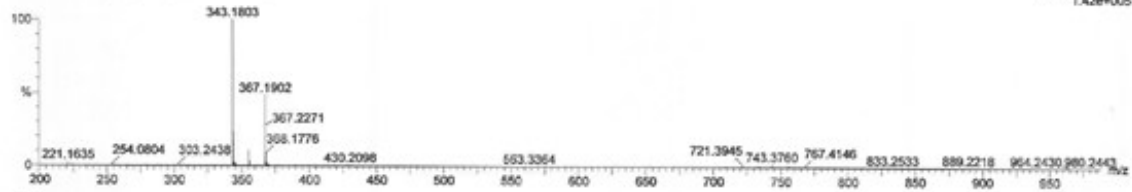

| Mass     | Calc. Mass | mDa  | PPM  | DBE | i-FIT | Formula         |
|----------|------------|------|------|-----|-------|-----------------|
| 343.1803 | 343.1822   | -1.9 | -5.5 | 9.5 | 245.7 | C20 H24 N2 O2 F |

*R. S. Jayaraman 23/02/2016*

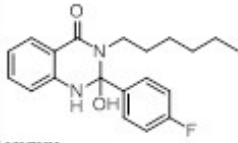

**DR.REDDY'S LABORATORIES LIMITED,CPS**  
 Analytical Research Department

Peak Table

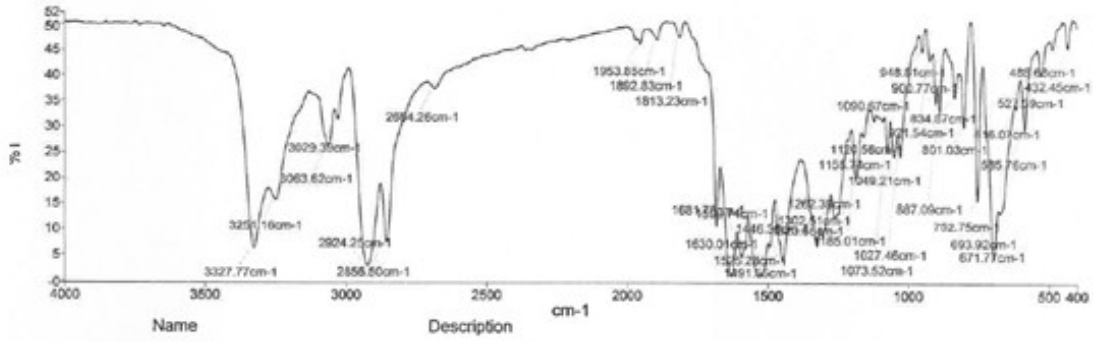

INC-106 C383/C0881/052 Pr-1

AR.No: MR0116/016

Analyt : Mallikarjun  
 Solvent : cdcl3  
 Date : Jan 12 2016  
 NUCLEUS : 81  
 PFG (MHz) : 400.22  
 EXP : proton

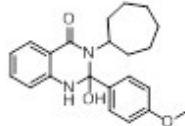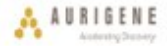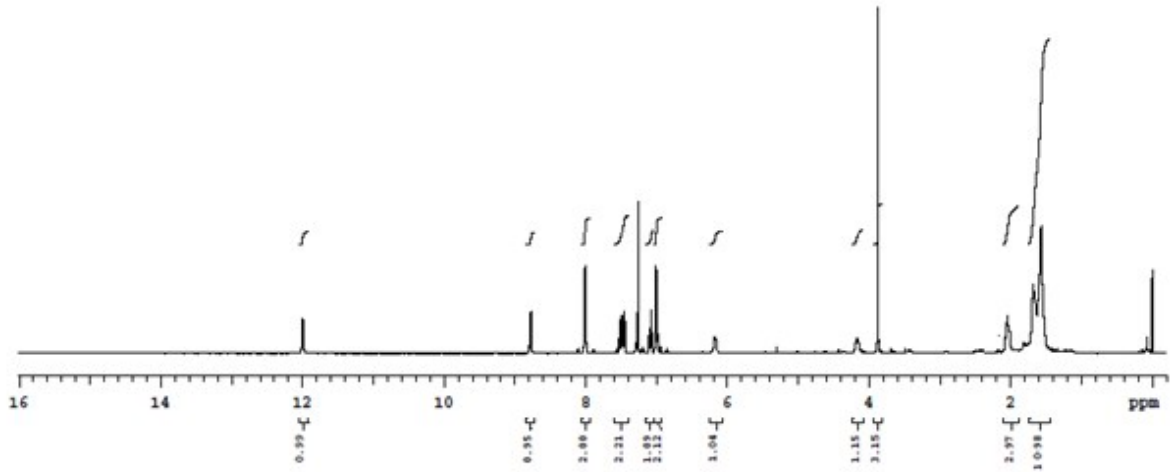

YDC-166 C181/C0881/052

A.S.No: MS0216/526

Analyte : Mallikarjun  
Solvent : cdcl3  
Date : Feb 7 2016  
INSTRUM : CL3  
PRO (MHz) : 100.65  
EXP : CARBON

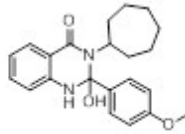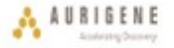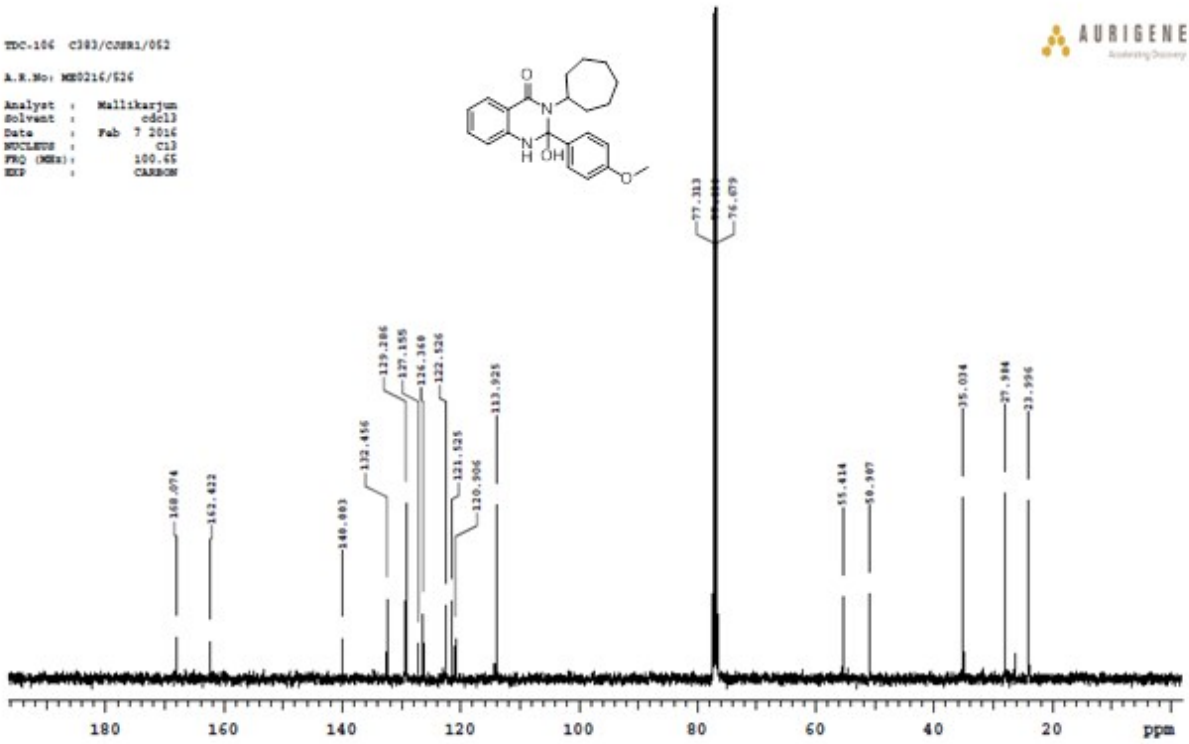

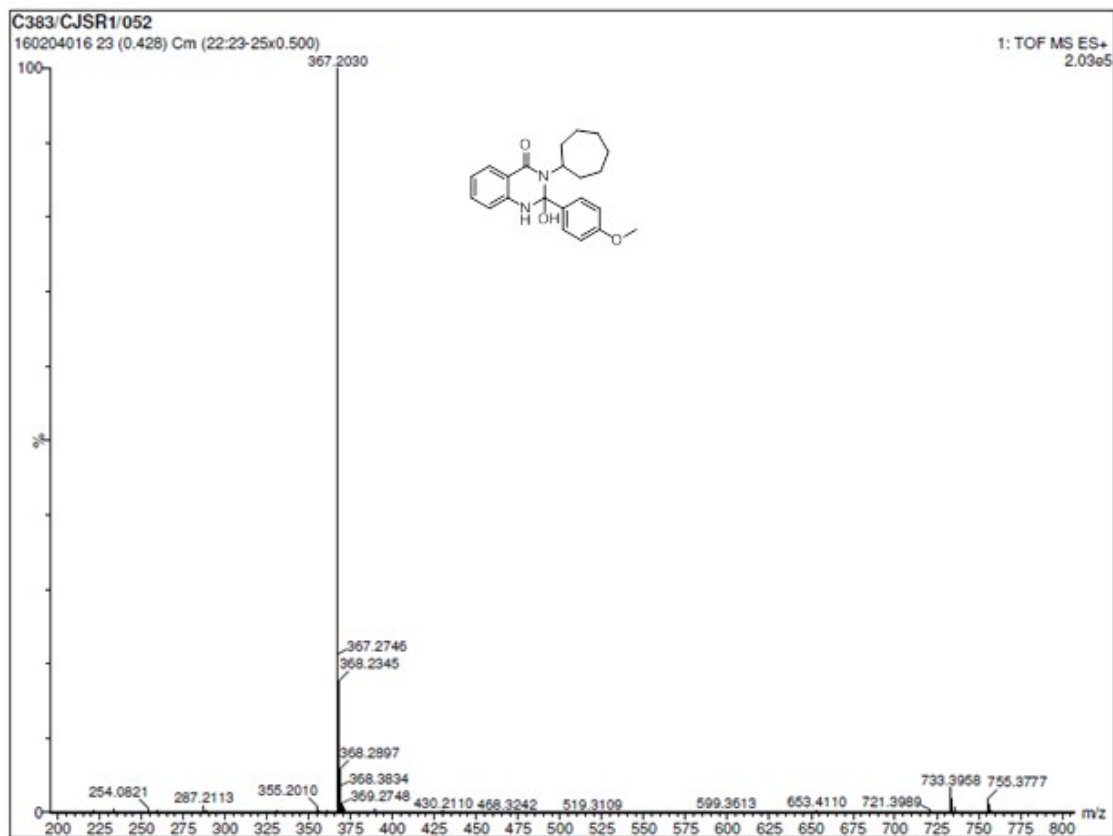

PerkinElmer Spectrum ES Version 10.03.08  
Friday, February 05, 2016 7:28 PM

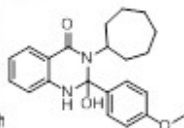

**DR.REDDY'S LABORATORIES LIMITED,CPS**  
Analytical Research Department

**Peak Table Graph**

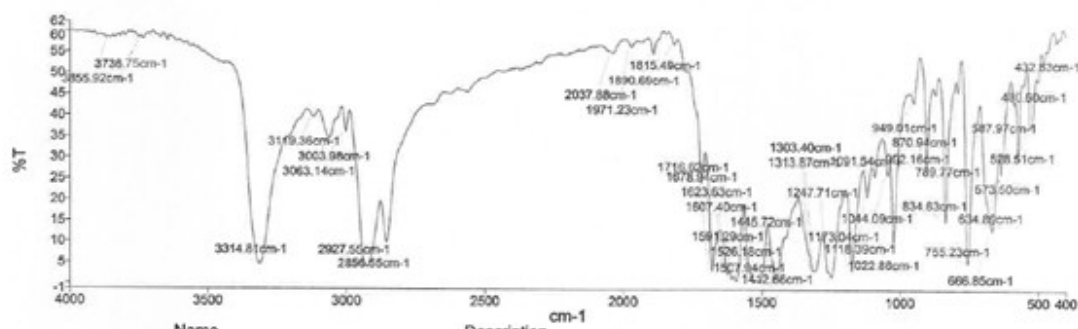

Name: C383-CJSR1-052-FR1\_1\_1 Description: Sample 009 By pet2 Date Friday, February 05 2016

Analyzed By: pet2  
Analyzed Date: 2/5/2016 7:27:39 PM

TDC-106 C383-C3881-055-Pr-2

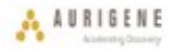

A.R.No: MS0116/2095  
Analyst : Mallikarjun  
Solvent : cdcl3  
Date : Jan 28 2016  
MOLECULE : 81  
FREQ (MHz): 400.12  
EXP : PROTON

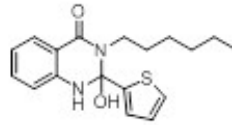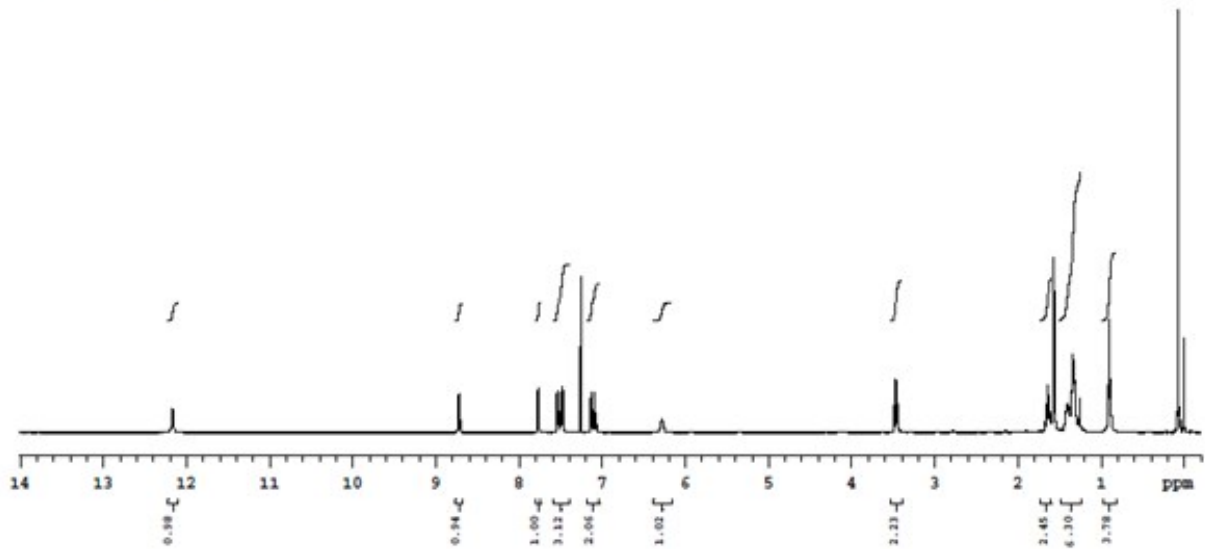

TDC-106 C383-C3881/055

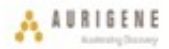

A.R.No: MS0216/2104  
Analyst : Mallikarjun  
Solvent : cdcl3  
Date : Feb 24 2016  
MOLECULE : C13  
FREQ (MHz): 100.65  
EXP : CARBON

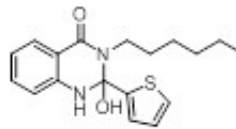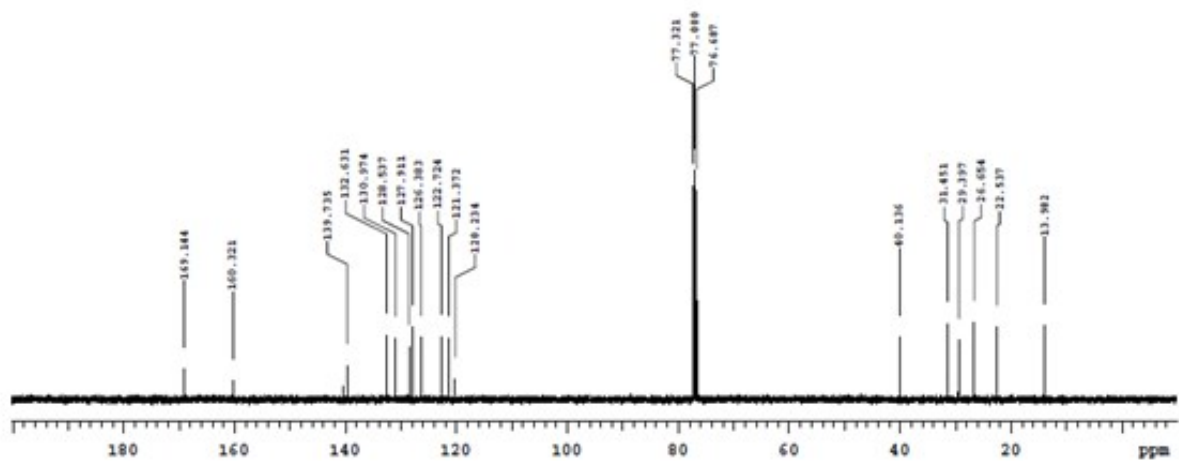

Elemental Composition Report

Single Mass Analysis

Tolerance = 5.0 PPM / DBE: min = -1.5, max = 100.0  
 Element prediction: Off  
 Number of isotope peaks used for i-FIT = 2

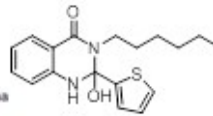

Monoisotopic Mass, Even Electron Ions  
 139 formula(e) evaluated with 1 results within limits (up to 10 closest results for each ma  
 Elements Used:  
 C: 0-20 H: 0-29 N: 0-3 O: 0-5 S: 0-2  
 C383-CJSR1-055  
 160204020 34 (0.634) Cm (34.36-68.72x0.500)

1: TOF MS ES+  
 3.89e+04

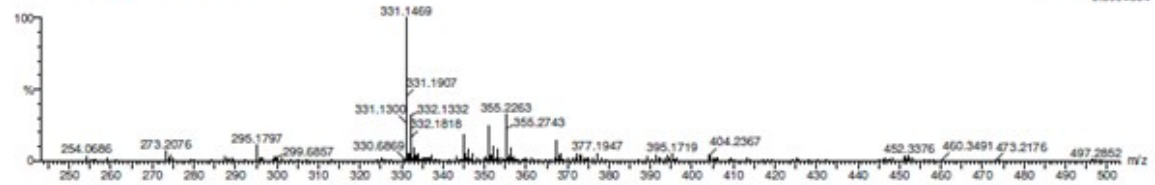

| Minimum: | Maximum: | mDa  | PPM  | DBE | i-FIT  | Formula         |
|----------|----------|------|------|-----|--------|-----------------|
| -1.5     | 100.0    |      |      |     |        |                 |
| 331.1469 | 331.1480 | -1.1 | -3.3 | 8.5 | 6848.4 | C18 H23 N2 O2 S |

PerkinElmer Spectrum ES Version 10.03  
 Friday, February 05, 2016 7:16

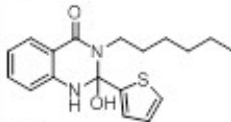

DR.REDDY'S LABORATORIES LIMITED,CPS  
 Analytical Research Department

Peak Table Graph

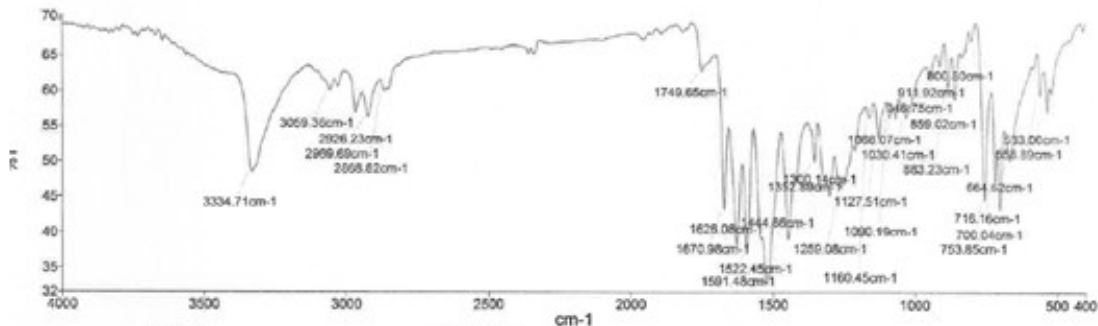

Name Description  
 C383-CJSR1-055 Sample 007 By pet2 Date Friday, February 05 2016

TDC-106 C383-CR081-066

A.R.No: M02216/205

Analyst : Mallikarjun  
Solvent : cdcl3  
Date : Feb 4 2016  
NUCLEUS : 81  
PFG (MHz): 400.22  
EXP : 28070M

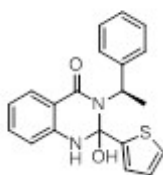

**AURIGENE**  
Redefining Discovery

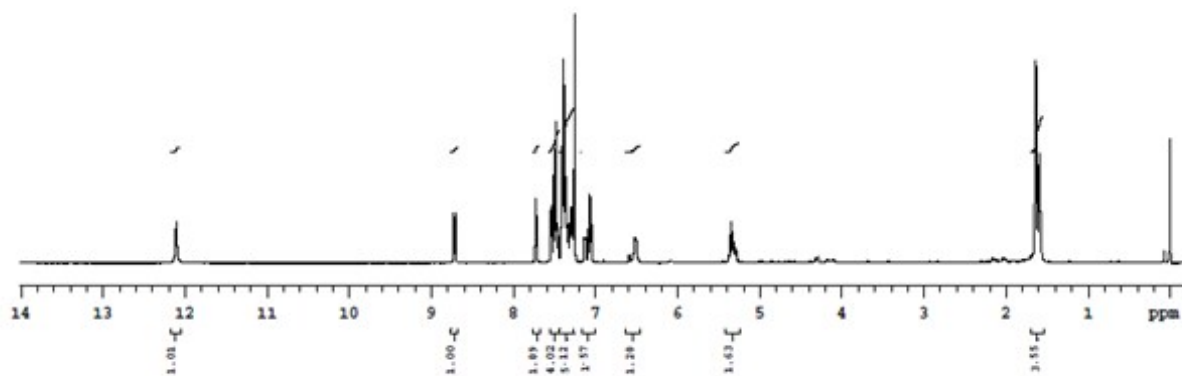

TDC-106 C383-CR081-066

A.R.No: M02216/1071

Analyst : Mallikarjun  
Solvent : cdcl3  
Date : Feb 12 2016  
NUCLEUS : C13  
PFG (MHz): 100.65  
EXP : CARBON

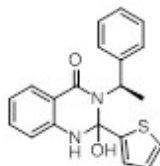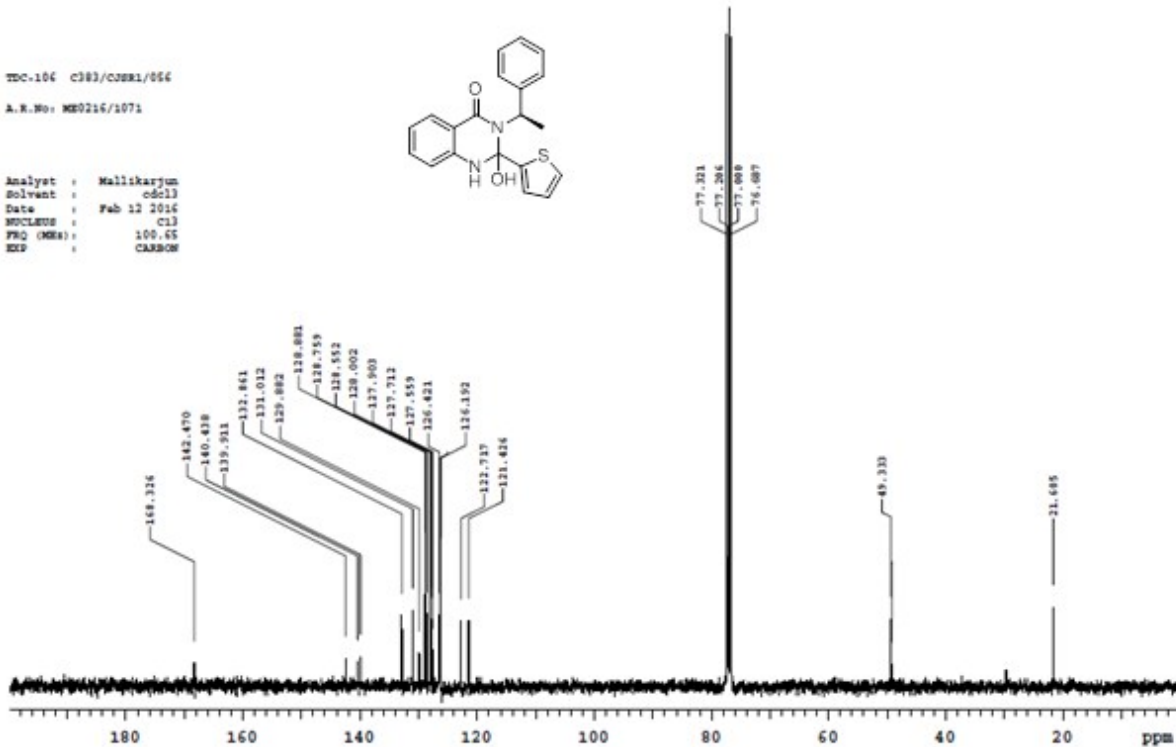



**Elemental Composition Report**

**Single Mass Analysis**

Tolerance = 5.0 PPM / DBE: min = -1.5, max = 100.0  
 Element prediction: Off  
 Number of isotope peaks used for i-FIT = 2

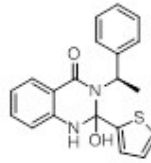

Monoisotopic Mass, Even Electron Ions  
 169 formula(e) evaluated with 1 results within limits (up to 10 closest results for each mass)  
 Elements Used:  
 C: 0-24 H: 0-20 N: 0-3 O: 0-5 S: 0-2  
 C383/CJSR1/056  
 160204019 37 (0.692) Cm (37.38-56.60x0.500)

1: TOF MS ES+  
 1.44e+005

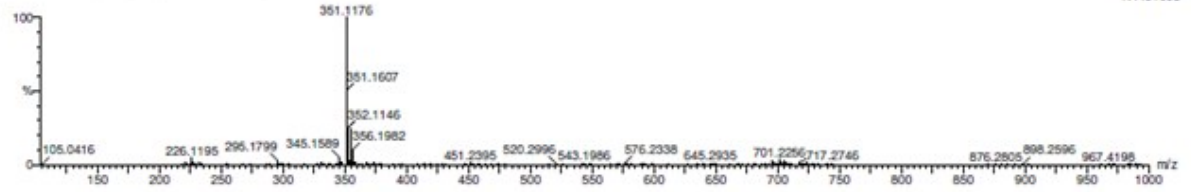

|          |            |     |      |       |       |                 |  |
|----------|------------|-----|------|-------|-------|-----------------|--|
| Minimum: |            |     |      |       |       |                 |  |
| Maximum: | 5.0        | 5.0 | -1.5 | 100.0 |       |                 |  |
| Mass     | Calc. Mass | mDa | PPM  | DBE   | i-FIT | Formula         |  |
| 351.1176 | 351.1167   | 0.9 | 2.6  | 12.5  | 34.0  | C20 H19 N2 O2 S |  |

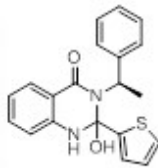

PerkinElmer Spectrum ES Version 10.03.08  
 Friday, February 05, 2016 7:16 PM

**DR.REDDY'S LABORATORIES LIMITED,CPS**  
 Analytical Research Department

**Peak Table Graph**

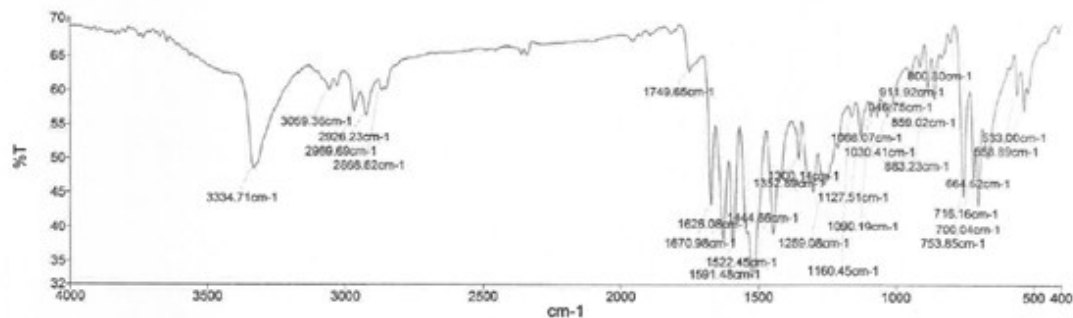

Name: C383-CJSR1-056\_1\_1  
 Description: Sample 007 By pet2 Date Friday, February 05 2016

Analyzed By: pet2  
 Analyzed Date: 2/5/2016 7:13:23 PM

TDC-106 C383/C0881/057 Fr-2

A.R.No: MS0216/492

Analyst : Mallikarjun  
Solvent : cdcl3  
Date : Feb 5 2016  
Nucleus : 400  
PQC (MHz): 400.12  
IMP : PROTON

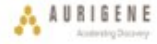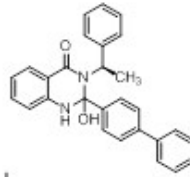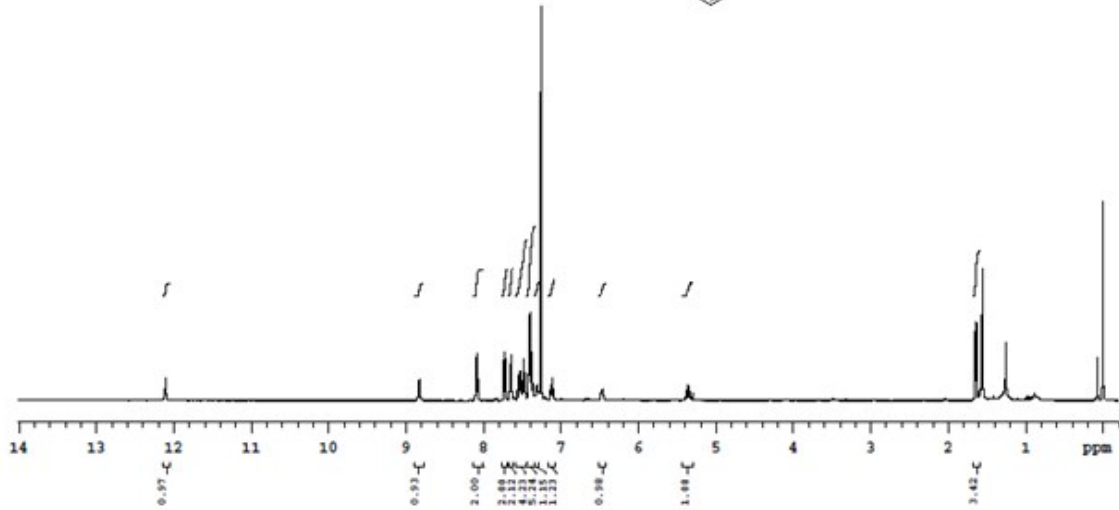

TDC-106 C383/C0881/057

A.R.No: MS0216/1069

Analyst : Mallikarjun  
Solvent : cdcl3  
Date : Feb 11 2016  
Nucleus : C13  
PQC (MHz): 100.65  
IMP : CARBON

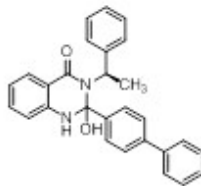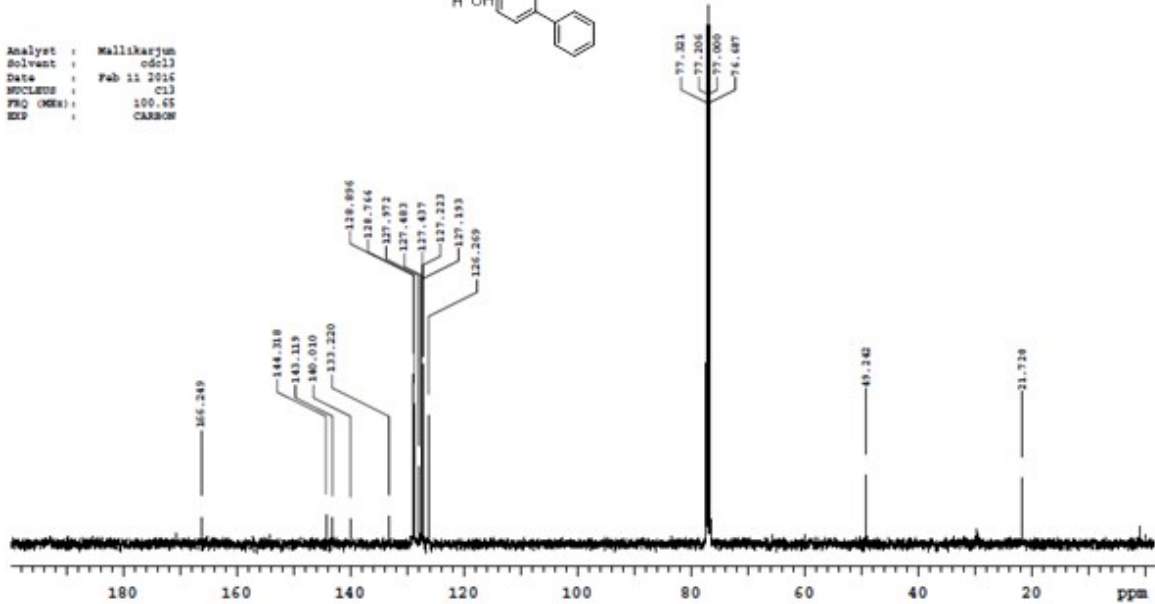

**Elemental Composition Report**

**Single Mass Analysis**

Tolerance = 5.0 PPM / DBE: min = -1.5, max = 100.0  
 Element prediction: Off  
 Number of isotope peaks used for I-FIT = 2

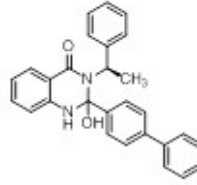

Monoisotopic Mass, Even Electron Ions  
 28 formula(e) evaluated with 1 results within limits (up to 2 closest results for each mass)  
 Elements Used:  
 C: 0-30 H: 0-26 N: 0-3 O: 0-4  
 C383CJSR1057  
 160209002 44 (0.812) Cm (44.51-79.90±0.500)

1: TOF MS ES+  
 1.90e+004

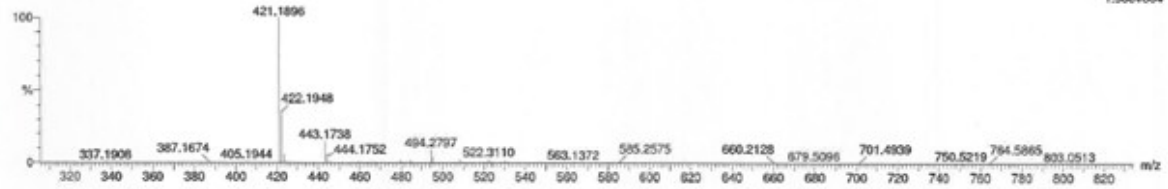

| Minimum: | Maximum: | Mass     | Calc. Mass | mDa  | PPM  | DBE  | 1-FIT | Formula       |
|----------|----------|----------|------------|------|------|------|-------|---------------|
|          |          | 421.1896 | 421.1916   | -2.0 | -4.7 | 17.5 | 13.8  | C28 H25 N2 O2 |

*R. Nagarkatti 22/01/2016*

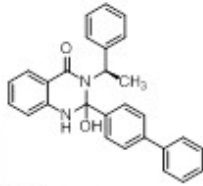

**DR. REDDY'S LABORATORIES LIMITED, CPS**  
 Analytical Research Department

**Peak Table Graph**

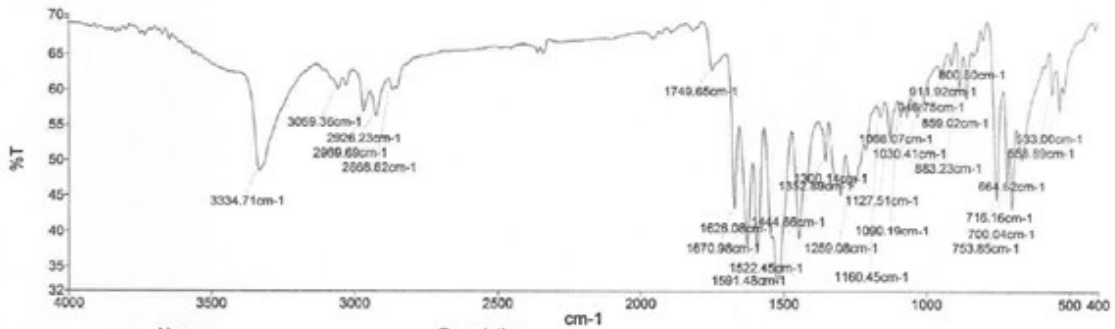

Name: C383-CJSR1-057\_1\_1 Description: Sample 007 By pet2 Date Friday, February 05 2016

Analyzed By: pet2  
 Analyzed Date: 2/5/2016 7:13:23 PM  
 Checked By:  
 Checked Date:

CSIL/CSIL14/009-Fr-1 in CDCl3  
A.R.No: NE167215

Sample Name:

Data Collected on:  
DRHS-vmmr400  
Archive directory:

Sample directory:

FidFile: PROTON

Pulse Sequence: PROTON (s2pul)  
Solvent: cdcl3  
Data collected on: Jun 17 2016

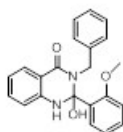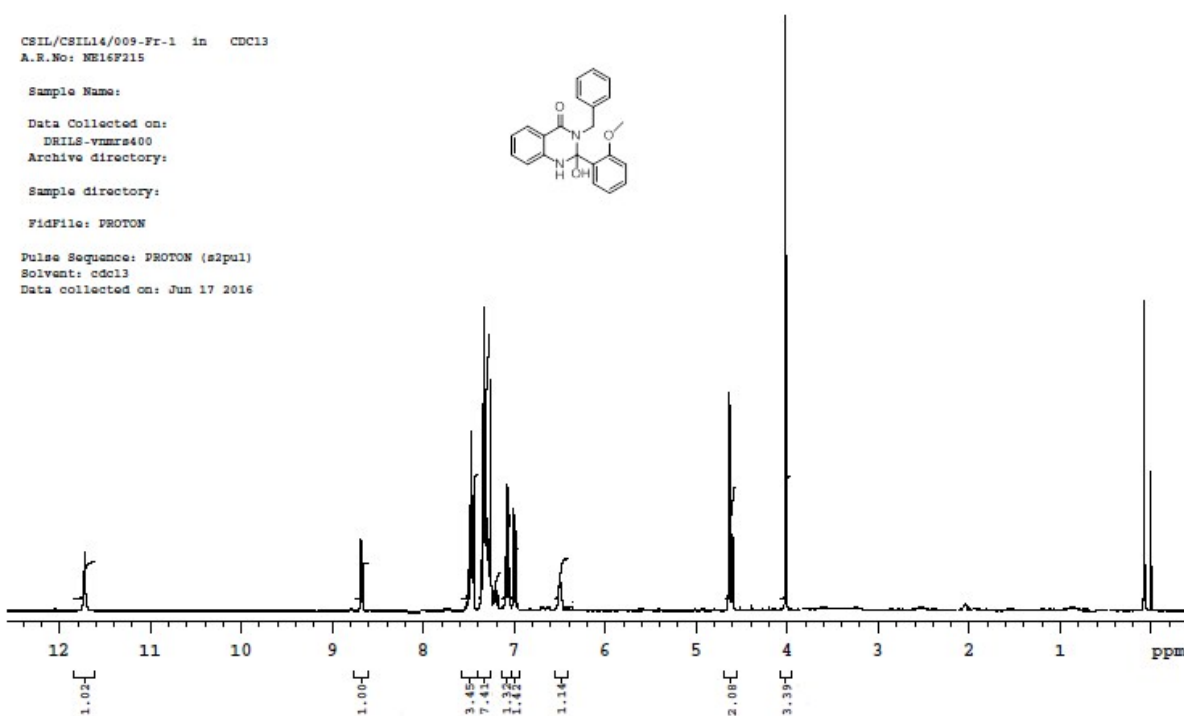

Dr. Reddy's  
C383/CJSR1/066 (Fr-2)  
13C-NMR\CDCL3  
21-06-2016  
ANALYSED BY : KRP

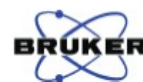

169.13  
167.36  
165.46  
159.91  
159.79  
139.72  
136.34  
132.46  
129.77  
129.49  
126.49  
122.83  
121.52  
120.87  
119.17  
118.50  
118.34  
117.44  
112.43  
112.29

55.40  
40.10

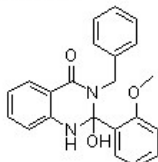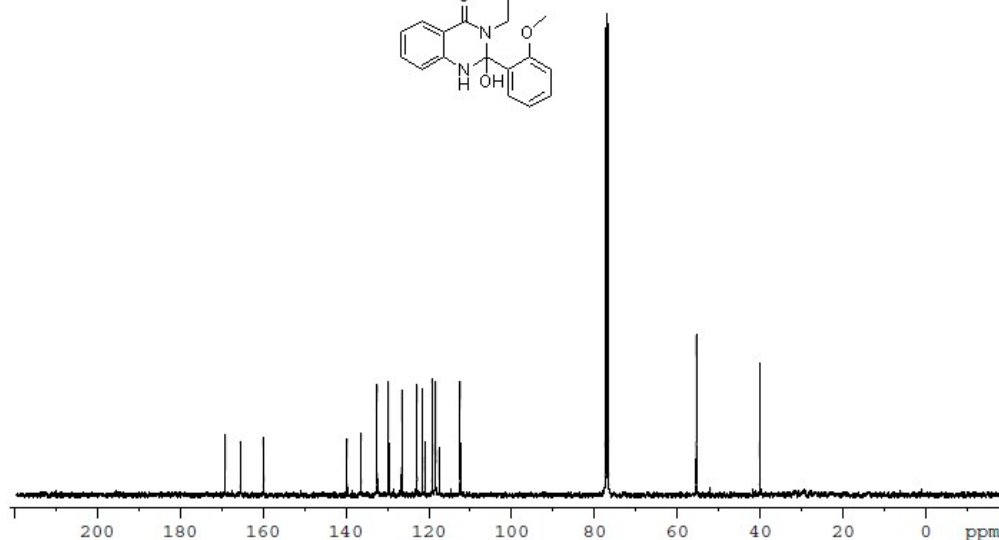

Current Data Parameters  
NAME QC11160621034  
EXPNO 1  
PROCNO 1

F2 - Acquisition Parameters  
Date\_ 20160621  
Time 22.46  
INSTRUM spect  
PROBHD 5 mm DABBO BB/  
PULPROG zgpg30  
TD 24036  
SOLVENT CDCl3  
NS 1024  
DS 4  
SWH 24038.461 Hz  
FIDRES 1.000102 Hz  
AQ 0.4999488 sec  
RG 195.98  
DW 20.800 usec  
DE 6.50 usec  
TE 298.1 K  
D1 2.0000000 sec  
D11 0.0300000 sec  
TDO 1

----- CHANNEL f1 -----  
SFO1 100.6228293 MHz  
NUC1 13C  
P1 10.00 usec  
PLM1 52.0000000 W  
----- CHANNEL f2 -----  
SFO2 400.1316005 MHz  
NUC2 1H  
CDDPRG[2] waltz16  
PCPD2 90.00 usec  
PLM2 13.0000000 W  
PLM12 0.31457001 W  
PLM13 0.25479999 W

F2 - Processing parameters  
SI 32768  
SF 100.6127715 MHz  
WDW EM  
SFB 0  
LB 3.00 Hz  
GB 0  
PC 1.40

Elemental Composition Report

Single Mass Analysis

Tolerance = 5.0 PPM / DBE: min = -1.5, max = 100.0

Element prediction: Off

Number of isotope peaks used for i-FIT = 2

Monoisotopic Mass, Even Electron Ions  
34 formula(e) evaluated with 1 results within limits (up to 10 closest results for each mass)

Elements Used:  
C: 0-25 H: 0-29 N: 0-3 O: 0-4

CSIL/CSIL14/009-Fr-1  
160204015.7 (0.131) Cm (7-24x0.500)

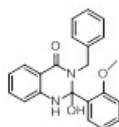

1: TOF MS ES+  
1.92e+005

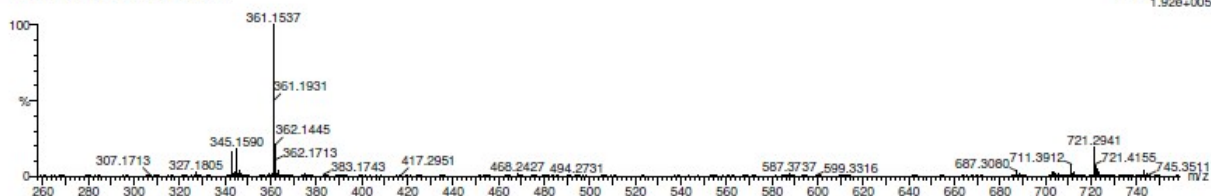

Minimum: -1.5  
Maximum: 100.0

| Mass     | Calc. Mass | mDa  | PPM  | DBE  | i-FIT   | Formula       |
|----------|------------|------|------|------|---------|---------------|
| 361.1537 | 361.1552   | -1.5 | -4.2 | 13.5 | 12316.0 | C22 H21 N2 O3 |

CSIL/CSIL14/009-Fr-2 in CDCl3  
A.R.No: NE16F216

Sample Name:

Data Collected on:  
DRILS-vnmr400  
Archive directory:

Sample directory:

FidFile: PROTON

Pulse Sequence: PROTON (s2pul)  
Solvent: cdcl3  
Data collected on: Jun 17 2016

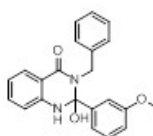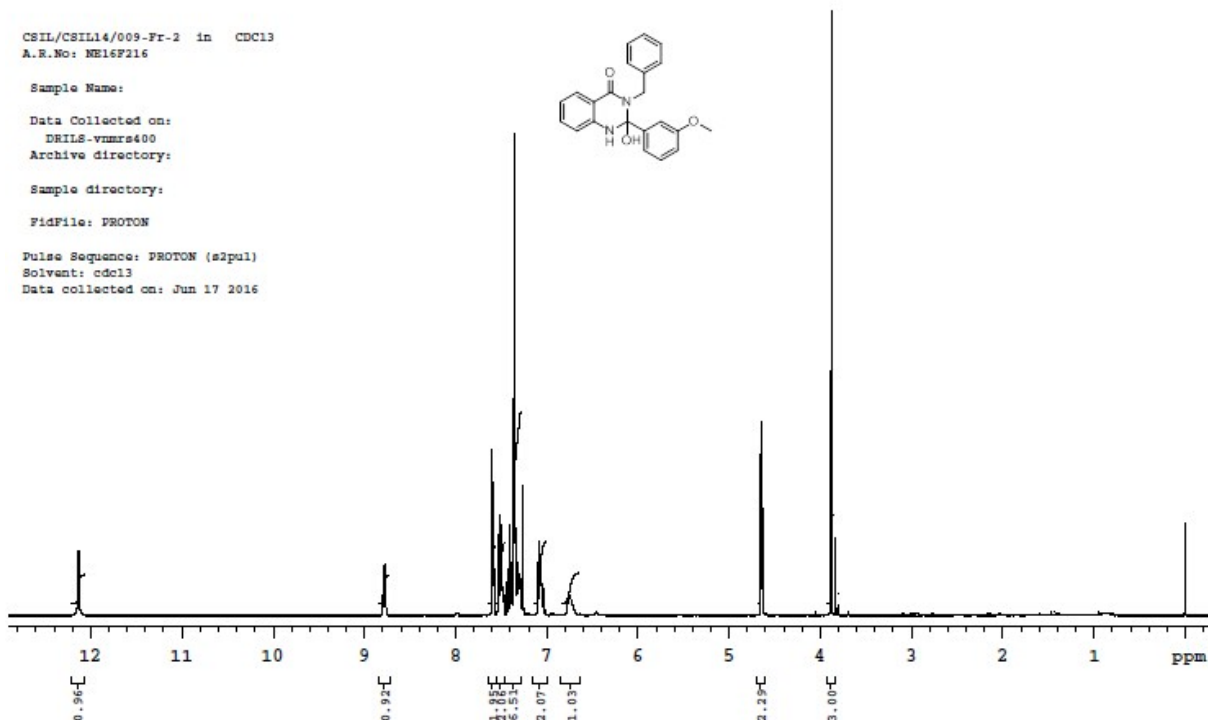

Dr. Reddy's  
 C383/CJSR1/064  
 13C-NMR\CDCL3  
 21-06-2016  
 ANALYSED BY : KRP

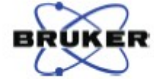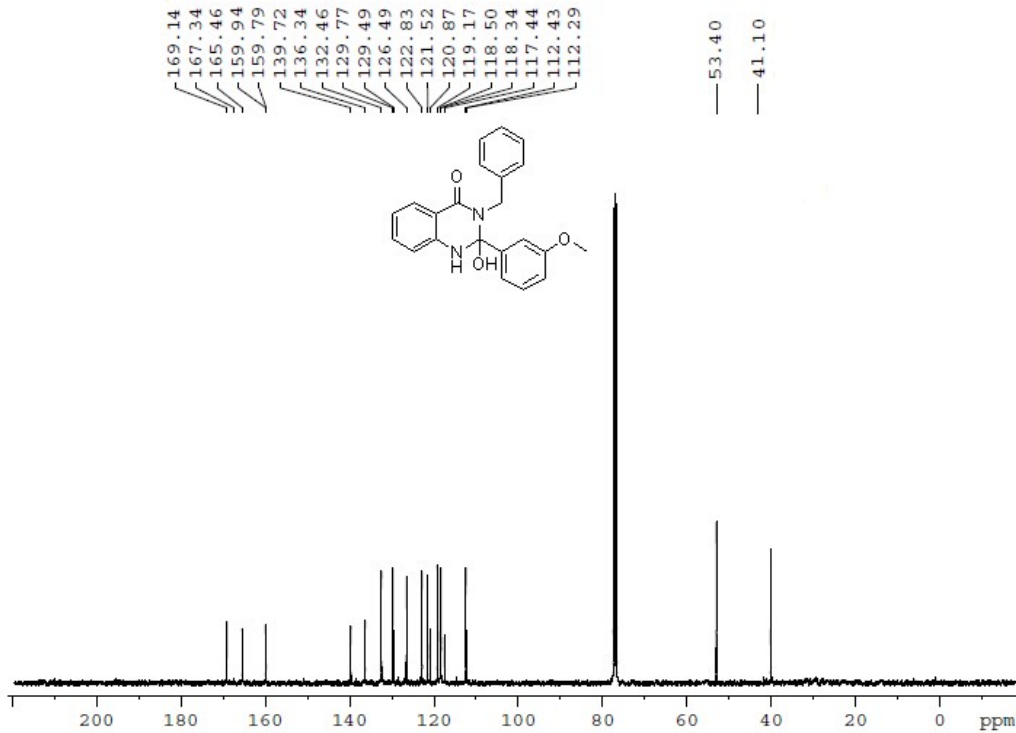

Current Data Parameters  
 NAME Qc11160621034  
 EXNO 1  
 PROCNO 1

F2 - Acquisition Parameters  
 Date\_ 20160621  
 Time 22.46  
 INSTRUM spect  
 PROBHD 5 mm DABBO BB/  
 PULPROG zgpg30  
 TD 24036  
 SOLVENT CDCL3  
 NS 1024  
 DS 4  
 SWH 24038.461 Hz  
 FIDRES 1.000102 Hz  
 AQ 0.4999488 sec  
 RG 195.98  
 DM 20.800 usec  
 DE 6.50 usec  
 TE 298.1 K  
 D1 2.0000000 sec  
 D11 0.03000000 sec  
 TD0 1

----- CHANNEL f1 -----  
 SFO1 100.6228293 MHz  
 NUC1 13C  
 P1 10.00 usec  
 PLW1 52.00000000 W

----- CHANNEL f2 -----  
 SFO2 400.1316005 MHz  
 NUC2 1H  
 CDDPRG2 waltz16  
 PCDD2 90.00 usec  
 PLW2 13.00000000 W  
 PLW12 0.31457001 W  
 PLW13 0.25479999 W

F2 - Processing parameters  
 SI 32768  
 SF 100.6127715 MHz  
 WDW EM  
 SSB 0  
 LB 3.00 Hz  
 GB 0  
 PC 1.40

**Elemental Composition Report**

**Single Mass Analysis**

Tolerance = 5.0 PPM / DBE: min = -1.5, max = 100.0  
 Element prediction: Off  
 Number of isotope peaks used for i-FIT = 2

Monoisotopic Mass, Even Electron Ions  
 34 formula(e) evaluated with 1 results within limits (up to 10 closest results for each mass)  
 Elements Used:  
 C: 0-25 H: 0-29 N: 0-3 O: 0-4  
 1602040157 (0.131) Cm (7-24x0.500)

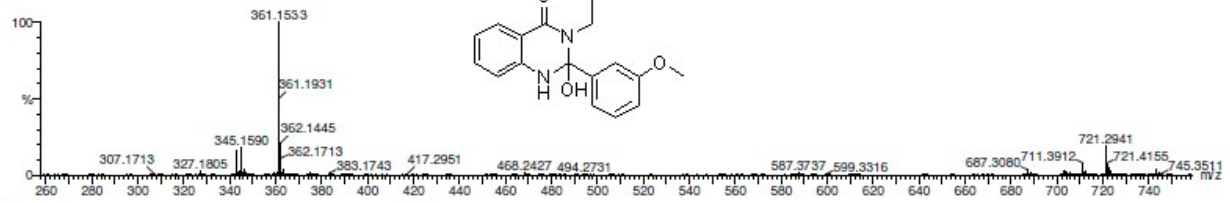

| Mass     | Calc. Mass | mDa  | PPM  | DBE  | i-FIT   | Formula       |
|----------|------------|------|------|------|---------|---------------|
| 361.1539 | 361.1552   | -1.5 | -4.2 | 13.5 | 12316.0 | C22 H21 N2 O3 |

CAYL10-001-Pr-3 in CDCl3  
A.R.No: NE16F240

Sample Name:

Data Collected on:  
DRILS-vmrs400  
Archive directory:

Sample directory:

FidFile: PROTON

Pulse Sequence: PROTON (s2pul)  
Solvent: cdcl3  
Data collected on: Jun 23 2016

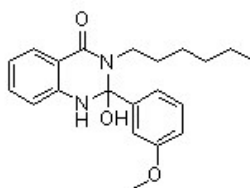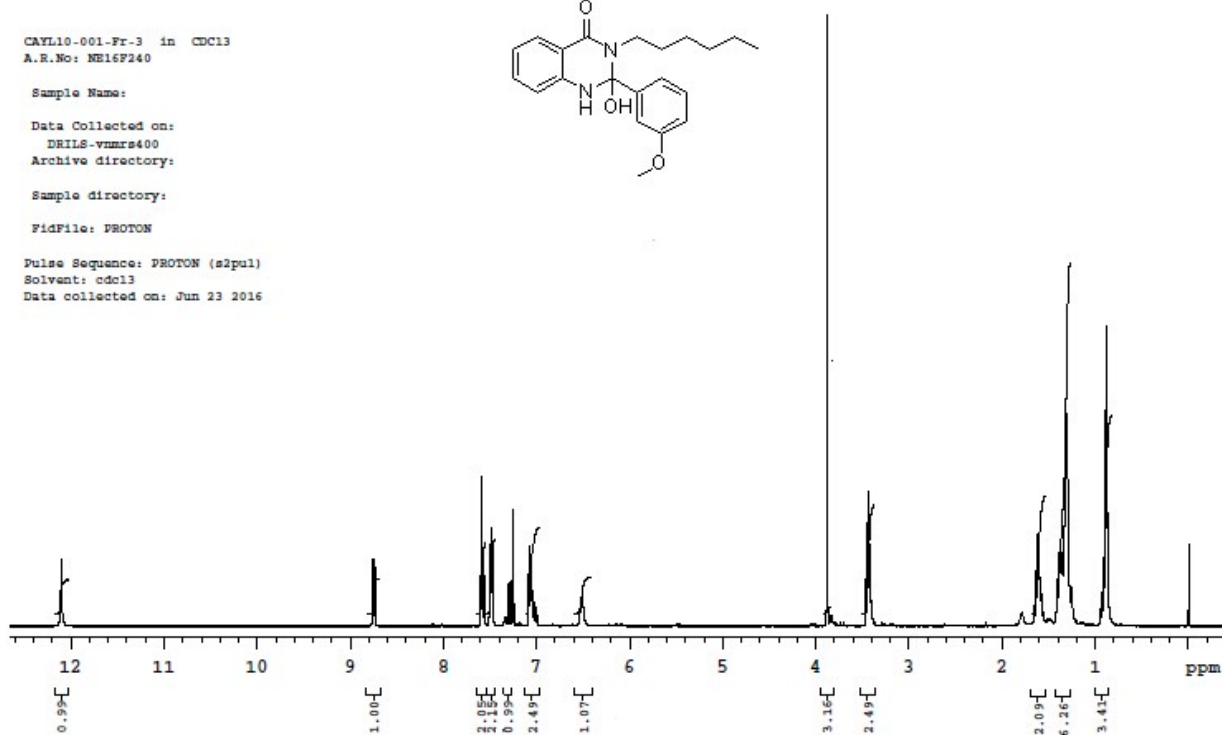

Dr. Reddy's  
C383/CJSR1/067 (Pr-2)  
13C-NMR\CDCL3  
21-06-2016  
ANALYSED BY : KRP

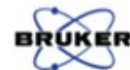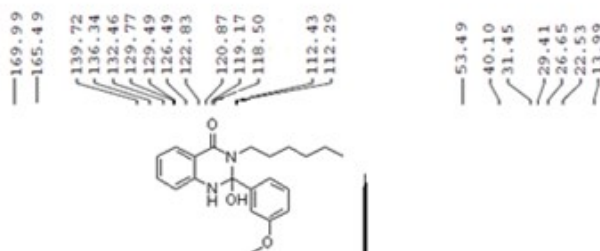

Current Data Parameters  
NAME QC116421034  
EXNO 1  
PROCNO 1

F2 - Acquisition Parameters  
Date\_ 20160421  
Time 22.44  
INSTRUM spect  
PROBHD 5 mm PABBO BB/  
PULPROG zgpg30  
TD 65536  
SOLVENT CDCl3  
NS 1024  
DS 4  
SWH 24038.461 Hz  
FIDRES 1.000102 Hz  
AQ 0.4995688 sec  
RG 195.88  
CW 20.800 usec  
DE 4.50 usec  
TE 298.15 K  
SI 2.0000000 sec  
SII 0.0300000 sec  
TDO 1

----- CHANNEL F1 -----  
EP01 100.6228293 MHz  
NUC1 13C  
P1 10.00 usec  
PLW1 52.0000000 W

----- CHANNEL F2 -----  
EP02 400.1314008 MHz  
NUC2 1H  
CROSSP2 waltz16  
PCP02 90.00 usec  
PLW2 13.0000000 W  
PLW12 0.2187001 W  
PLW13 0.25479999 W

F2 - Processing parameters  
SI 32768  
SF 100.6127715 MHz  
WDW EM  
SSB 0  
LB 3.00 Hz  
GB 0  
PC 1.40

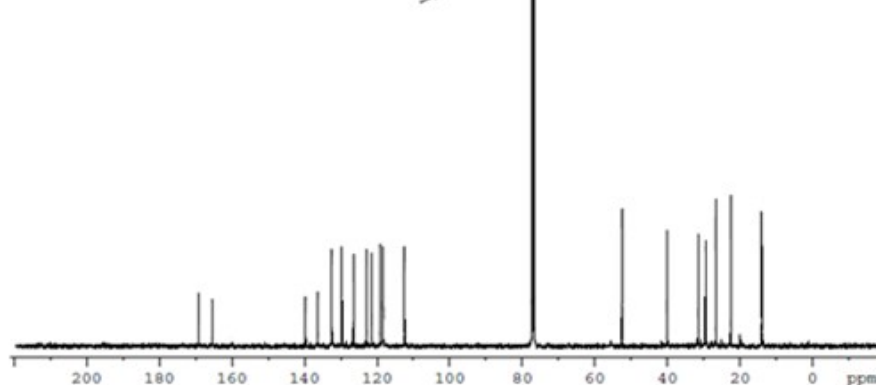

# Mass Analysis Report

**Data Filename** 160620005.d **Sample Name** C383/CJSR1/067 Fr-2  
**Sample Type** Sample **Position** Vial 23  
**Instrument Name** Instrument 1 **User Name**  
**Acq Method** ESI.m **IRM Calibration Status** Success  
**DA Method** CACH8.m **Comment**

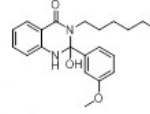

## User Spectra

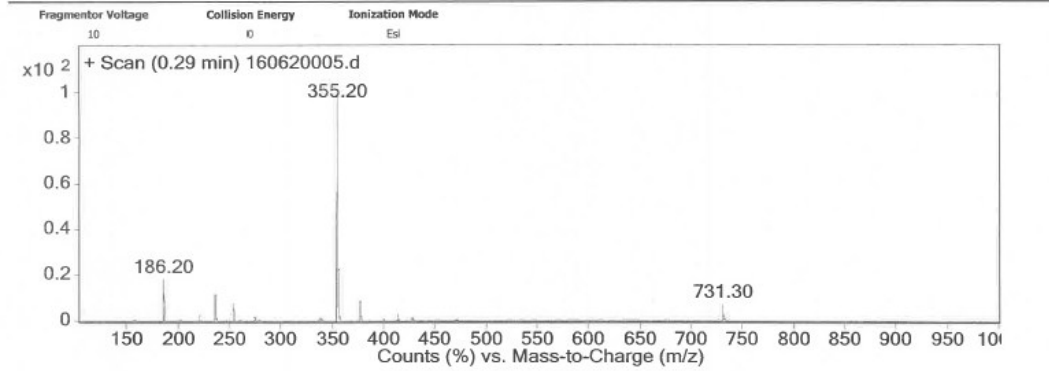

--- End Of Report ---

*B. Sait*  
2016/06/06

Dr. Reddy's  
 C383/CJSR1/066 (Fr-1)  
 1H-NMR\CDCL3  
 21-06-2016  
 ANALYSED BY : KRP

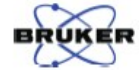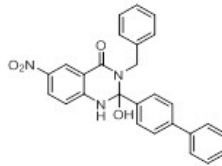

Current Data Parameters  
 NAME QC1160621029  
 EXPNO 1  
 PROCNO 1

F2 - Acquisition Parameters  
 Date\_ 20160621  
 Time 20.23  
 INSTRUM spect  
 PROBEHD 5 mm DABBO BB/  
 PULPROG zg30  
 TD 36856  
 SOLVENT CDCL3  
 NS 16  
 DS 2  
 SWH 12019.230 Hz  
 FIDRES 0.333349 Hz  
 AQ 1.4999295 sec  
 RG 195.98  
 EQ 41.600 usec  
 DE 6.50 usec  
 TR 298.1 K  
 D1 1.00000000 sec  
 TDO 1

----- CHANNEL f1 -----  
 SFO1 400.1324710 MHz  
 NUC1 1H  
 P1 14.00 usec  
 PLM1 13.47000027 W

F2 - Processing parameters  
 SI 65536  
 SF 400.1300097 MHz  
 MDW BM  
 SSB 0  
 LB 0.30 Hz  
 GB 0  
 PC 1.00

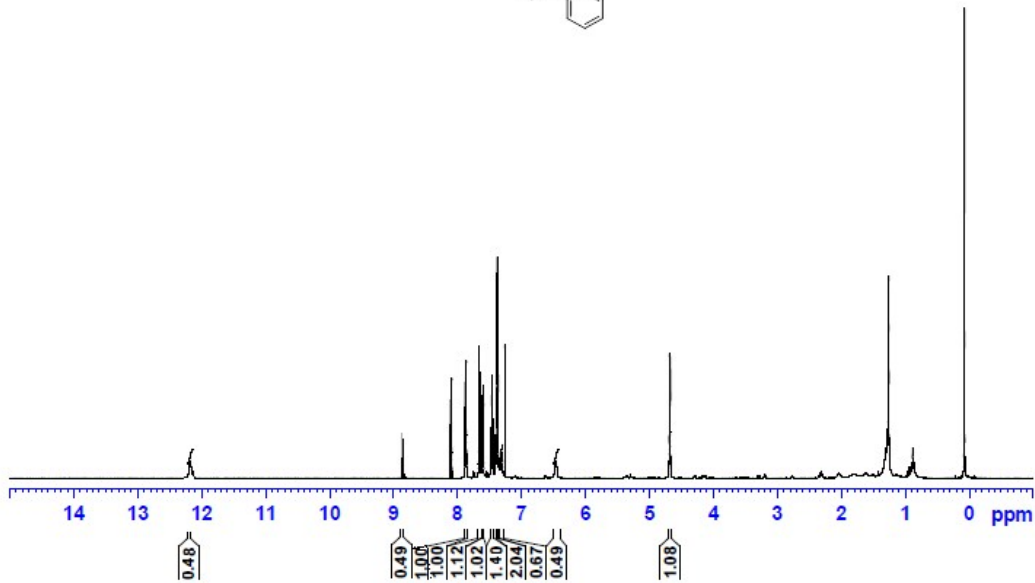



Dr. Reddy's  
 C383/CJSR1/066 (Fr-1)  
 13C-NMR\CDCL3  
 21-06-2016  
 ANALYSED BY : KRP

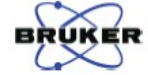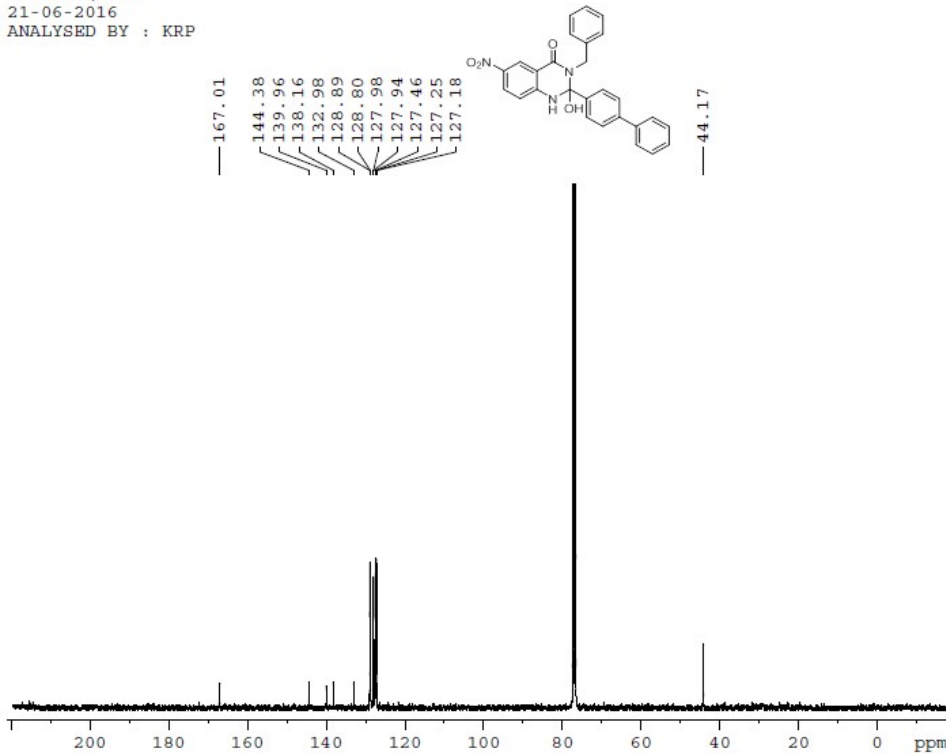

```

Current Data Parameters
NAME      QC1160621030
EXPNO    1
PROCNO   1

F2 - Acquisition Parameters
Date_    20160621
Time     21.08
INSTRUM  spect
PROBHD   5 mm DABBO BB/
PULPROG  zgpg30
TD        24036
SOLVENT  CDCl3
NS        1024
DS        4
SWH       24038.461 Hz
FIDRES    1.000102 Hz
AQ        0.4999488 sec
RG        195.98
DM        20.800 usec
DE        6.50 usec
TE        298.1 K
D1        2.00000000 sec
D11       0.03000000 sec
TDO       1

----- CHANNEL f1 -----
SFO1     100.6228293 MHz
NUC1      13C
P1        10.00 usec
PLW1     52.00000000 W

----- CHANNEL f2 -----
SFO2     400.1316005 MHz
NUC2      1H
CPDPRG2  waltz16
PCPD2    90.00 usec
PLW2     13.00000000 W
PLW12    0.31457001 W
PLW13    0.25479999 W

F2 - Processing parameters
SI        32768
SP        100.6127726 MHz
WDW       EM
SSB       0
LB        3.00 Hz
GB        0
PC        1.40
  
```

CPS,MIYAPUR

### Mass Analysis Report

|                 |              |                        |                     |
|-----------------|--------------|------------------------|---------------------|
| Data Filename   | 160617001.d  | Sample Name            | C383/CJSR1/066 Fr-1 |
| Sample Type     | Sample       | Position               | Vial 3              |
| Instrument Name | Instrument 1 | User Name              |                     |
| Acq Method      | ESI.m        | IRM Calibration Status | Success             |
| DA Method       | CACH8.m      | Comment                |                     |

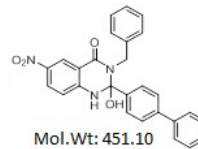

#### User Spectra

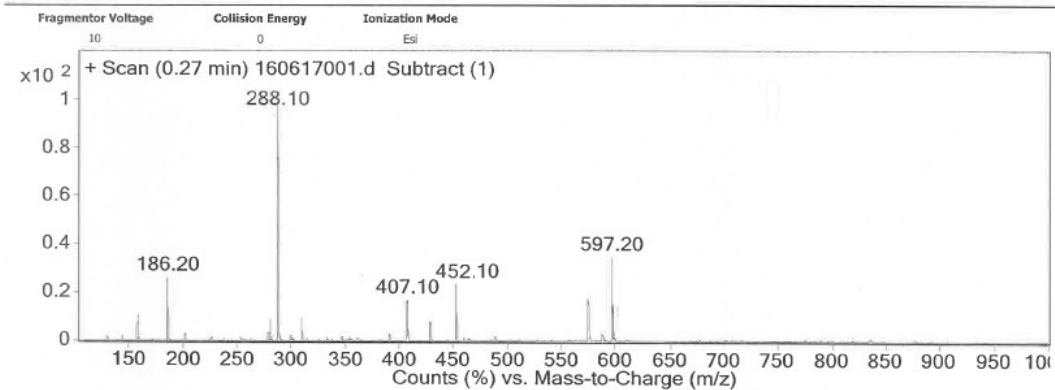

--- End Of Report ---

B. Srinivas  
 19/06/2016

TDC-106 C383/CJSR1/023

AR.No: ME1115/901

Analyst : Mallikarjun  
Solvent : cdcl3  
Date : Nov 10 2015  
NUCLEUS : H1  
FREQ (MHz): 400.22  
EXP : PROTON

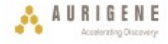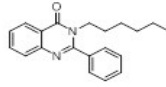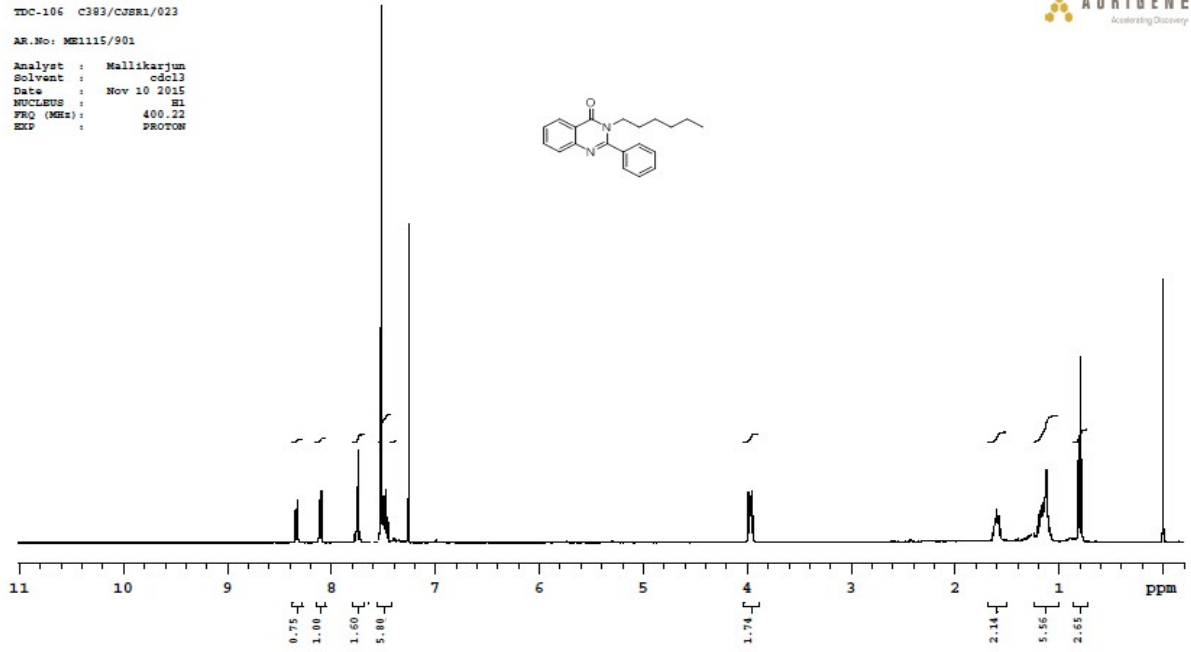

TDC-106 C383/CJSR1/023

AR.No: ME1115/2692

Analyst : Mallikarjun  
Solvent : cdcl3  
Date : Nov 29 2015  
NUCLEUS : C13  
FREQ (MHz): 100.65  
EXP : CARBON

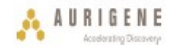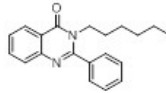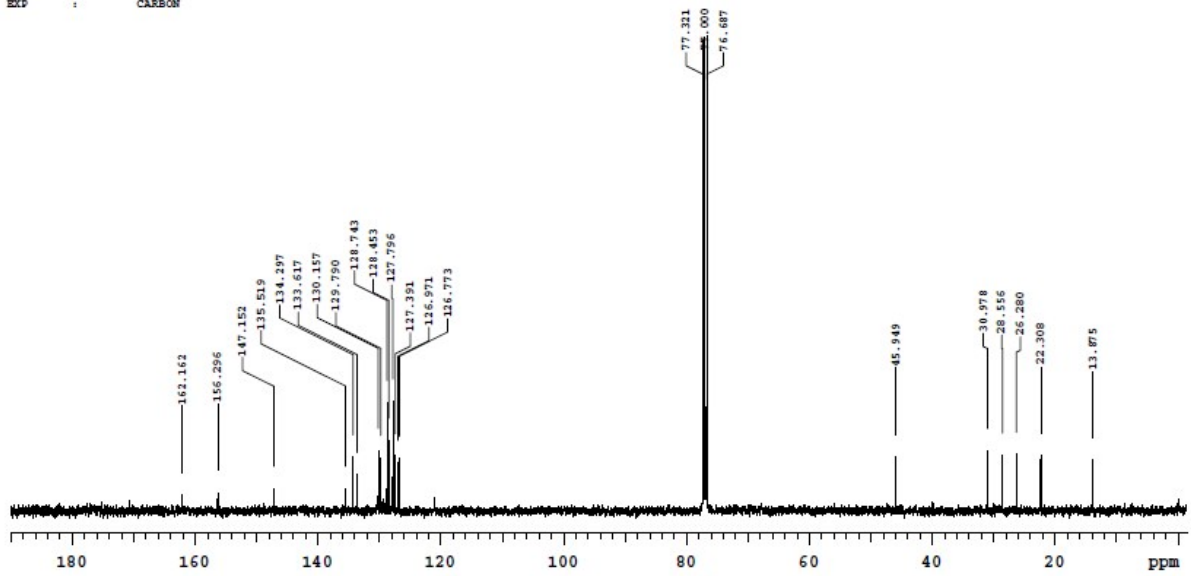

**Single Mass Analysis**

Tolerance = 5.0 PPM / DBE: min = -1.5, max = 100.0

Element prediction: Off

Number of isotope peaks used for i-FIT = 2

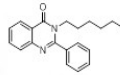

Monoisotopic Mass, Even Electron Ions

70 formula(e) evaluated with 1 results within limits (up to 10 closest results for each mass)

Elements Used:

C: 0-25 H: 0-25 N: 0-5 O: 0-4

C383/CJSR1/023

151125001 25 (0.472) Cm (25:26)

1: TOF MS ES+  
6.00e+005

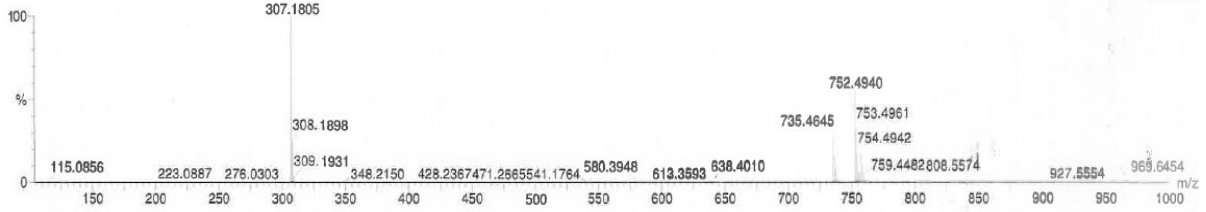

Minimum: -1.5  
Maximum: 100.0

| Mass     | Calc. Mass | mDa  | PPM  | DBE  | i-FIT | Formula      |
|----------|------------|------|------|------|-------|--------------|
| 307.1805 | 307.1810   | -0.5 | -1.6 | 10.5 | 545.9 | C20 H23 N2 O |

TDC-106 C383/CJSR1/030 (Fr-1)

AR.No: MB1115/1361

Analyst : Mallikarjun  
Solvent : cdcl3  
Date : Nov 17 2015  
NUCLEUS : H1  
FREQ (MHz): 400.22  
EXP : PROTON

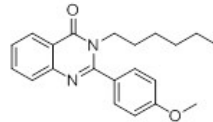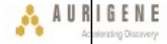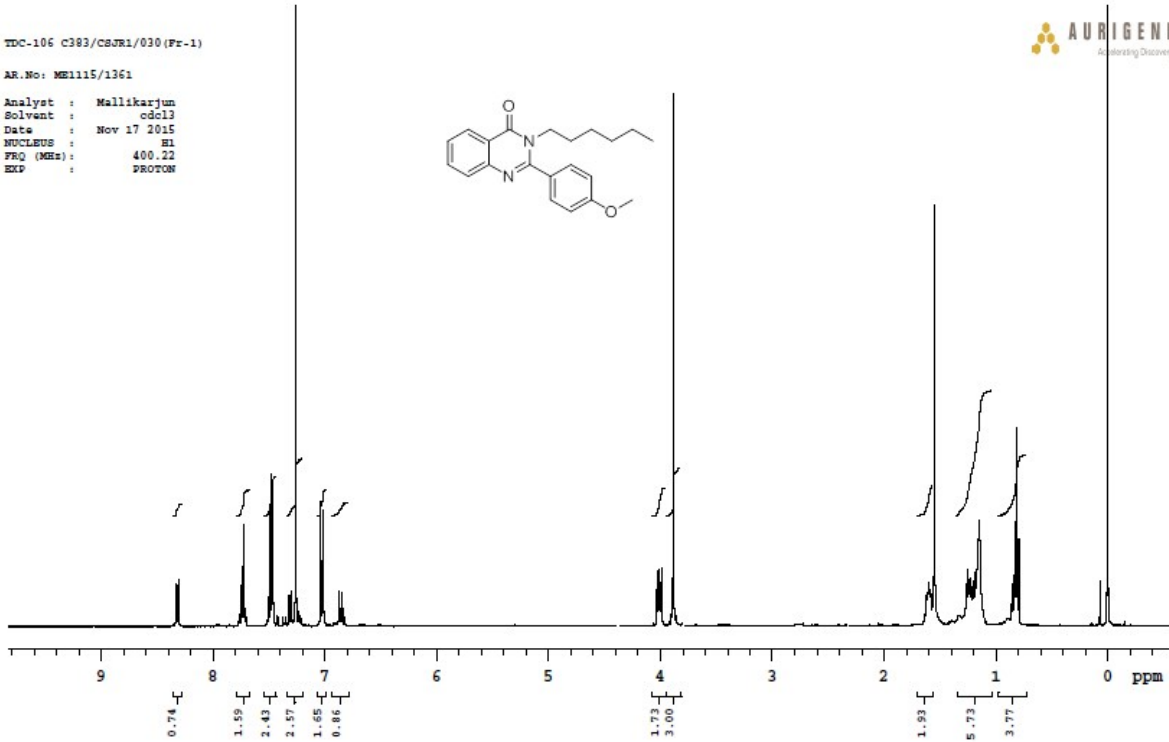

TDC-106 C383/CJSR1/030

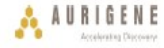

AR.No: ME1115/2694

Analyt : Mallikarjun  
Solvent : cd-cl3  
Date : Nov 29 2015  
NUCLEUS : C13  
FRQ (MHz): 100.65  
EXP : CARBON

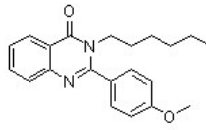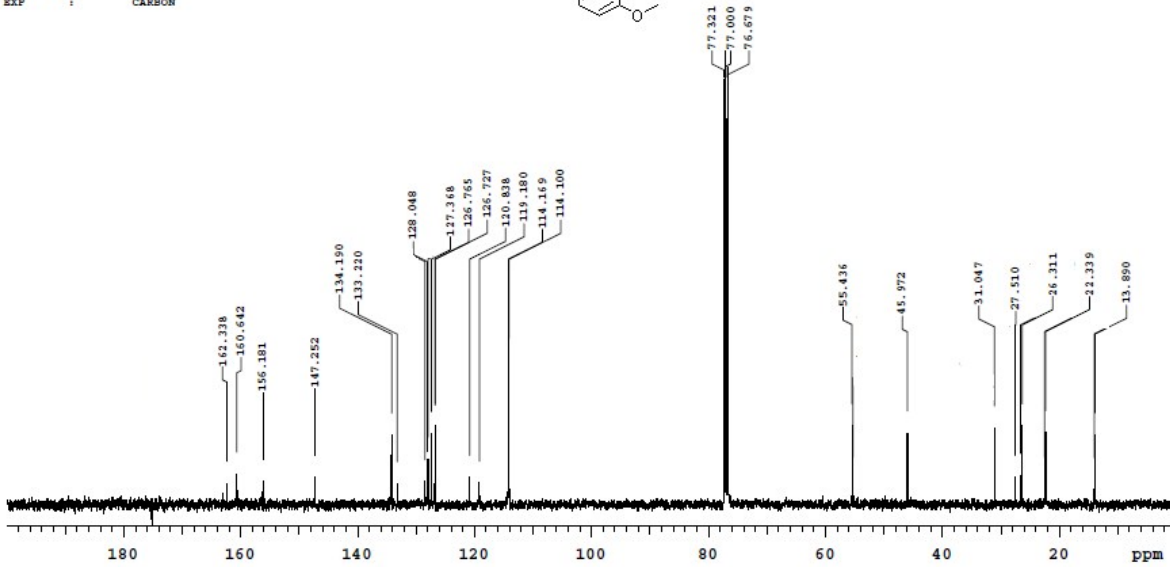

### Single Mass Analysis

Tolerance = 5.0 PPM / DBE: min = -1.5, max = 100.0

Element prediction: Off

Number of isotope peaks used for i-FIT = 2

Monoisotopic Mass, Even Electron Ions

47 formula(e) evaluated with 1 results within limits (up to 10 closest results for each mass)

Elements Used:

C: 0-22 H: 0-25 N: 0-5 O: 0-4

C383/CJSR1/030

151125004 29 (0.545) Cm (29:31)

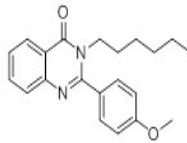

1: TOF MS ES+  
5.67e+005

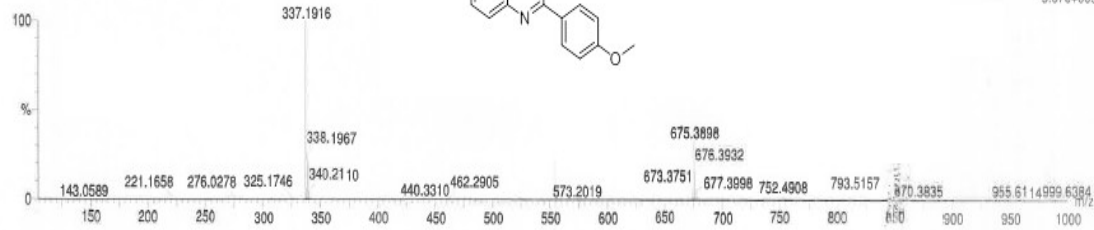

Minimum: -1.5  
Maximum: 5.0 5.0 100.0

| Mass     | Calc. Mass | mDa | PPM | DBE  | i-FIT | Formula       |
|----------|------------|-----|-----|------|-------|---------------|
| 337.1916 | 337.1916   | 0.0 | 0.0 | 10.5 | 53.9  | C21 H25 N2 O2 |
